# Supplementary material for: Insight into the Varying Reactivity of Different Catalysts for CO2 Cycloaddition into Styrene Oxide: An Experimental and DFT Study
Source: MDPI journal article supplement (doi:10.3390/ijms24032123), 2023-01-20
Supplement: s1 [file s1]

## Supporting Information for:

# Insight into the Varying Reactivity of Different Catalysts for CO<sub>2</sub> Cycloaddition into Styrene Oxide: An Experimental and DFT Study

Angelo Pio Sebaaly<sup>1,2</sup>, Hugo Dias<sup>2</sup>, Lorraine Christ<sup>2,\*</sup>, Lynda Merzoud<sup>1</sup>,  
Henry Chermette<sup>1</sup>, Guillaume Hoffmann<sup>1</sup> and Christophe Morell<sup>1,\*</sup>

1 Institut des Sciences Analytiques UMR CNRS 5280, Université Claude Bernard Lyon1, Université de Lyon,  
5 Rue La Doua, 69622 Villeurbanne, France

2 Institut de Recherches sur la Catalyse et l'Environnement de Lyon, IRCELYON, UMR CNRS 5256,  
Université Claude Bernard Lyon1, Université de Lyon, 2 Av. Albert Einstein, 69626 Villeurbanne, France

\* Correspondence: lorraine.christ@univ-lyon1.fr (L.C.); christophe.morell@univ-lyon1.fr (C.M.)

## Table of Contents

|                                          |          |
|------------------------------------------|----------|
| <b>1. Regioselectivity .....</b>         | <b>2</b> |
| <b>2. Non-covalent Interactions.....</b> | <b>3</b> |
| <b>3. Structures .....</b>               | <b>4</b> |

# 1. Regioselectivity

## 1-methylimidazole

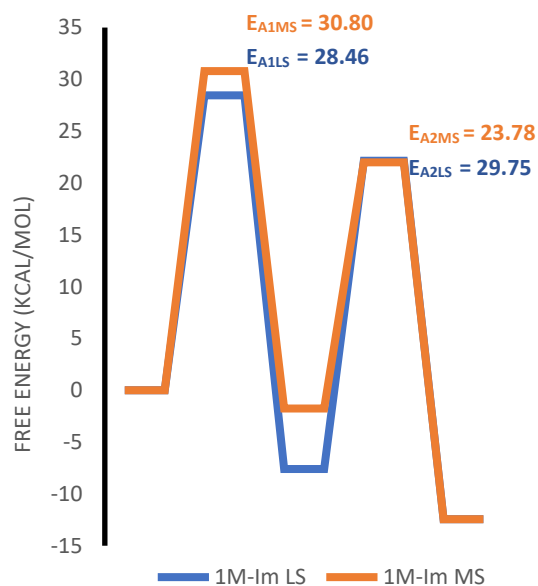

Figure S1. Free energy diagrams of 1M-Im catalyzed CO<sub>2</sub> cycloaddition, proceeding from the attack of the LB on the more substituted side of the epoxide in orange (1M-Im MS). In addition to that proceeding from the attack from the less substituted side in blue (1M-Im LS).

## 2-methylimidazole

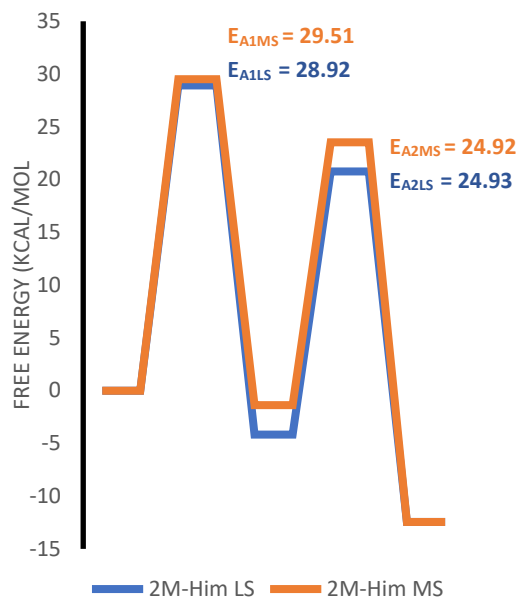

Figure S2. Free energy diagrams of 2M-Him catalyzed CO<sub>2</sub> cycloaddition, proceeding from the attack of the LB on the more substituted side of the epoxide in orange (2M-Him MS). In addition to that proceeding from the attack from the less substituted side in blue (2M-Him LS).

## 2-iodo-1-methylimidazole

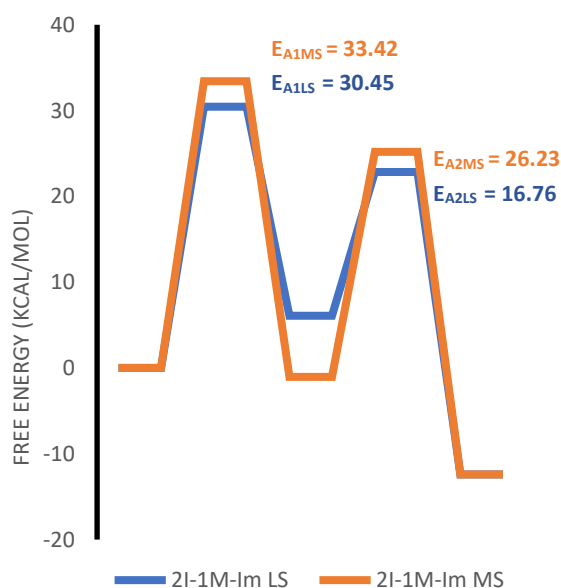

Figure S3. Free energy diagrams of 2I-1M-Im catalyzed CO<sub>2</sub> cycloaddition, proceeding from the attack of the LB on the more substituted side of the epoxide in orange (2I-1M-Im MS). In addition to that proceeding from the attack from the less substituted side in blue (2I-1M-Im LS).

## Benzimidazole

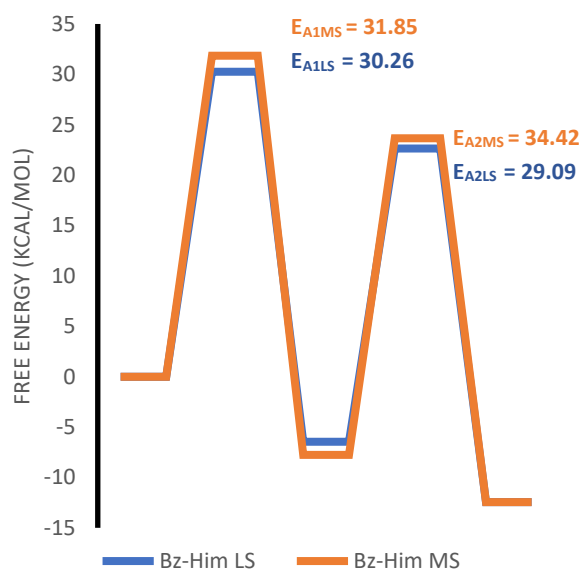

Figure S4. Free energy diagrams of Bz-Him catalyzed CO<sub>2</sub> cycloaddition, proceeding from the attack of the LB on the more substituted side of the epoxide in orange (Bz-Him MS). In addition to that proceeding from the attack from the less substituted side in blue (Bz-Him LS).

## 2. Non-Covalent Interactions

### Intermediate 1 1M-Im

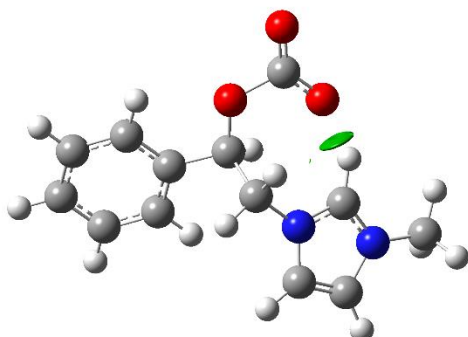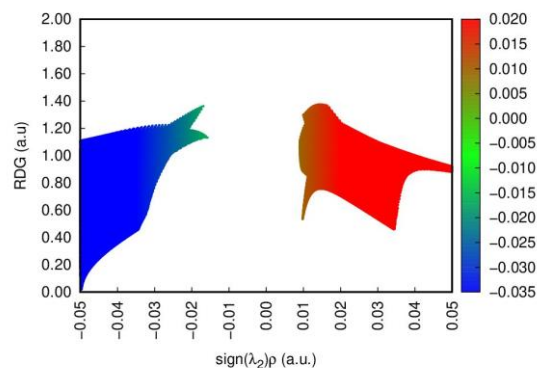

Figure S5. Visual representation of the NCI as a green surface (left). The Reduced Density Gradient (RDG) scatter graph representing the NCI of I1 1M-Im shown on the left

### Intermediate 1 Bz-HIm

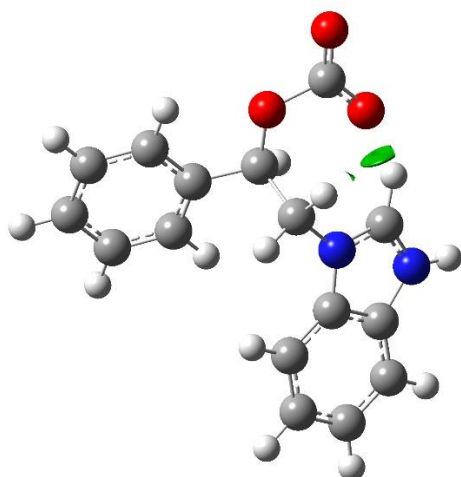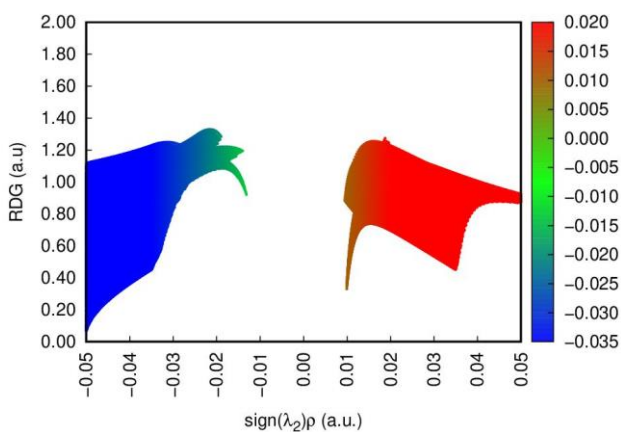

Figure S6. Visual representation of the NCI as a green surface (left). The Reduced Density Gradient (RDG) scatter graph representing the NCI of I1 Bz-HIm shown on the left

### 3. Structures

#### Imidazole

|   |             |             |             |
|---|-------------|-------------|-------------|
| C | 1.02456800  | -0.50622300 | -0.00005600 |
| C | -1.14060500 | -0.32655200 | -0.00001200 |
| C | -0.65435300 | 0.96800900  | 0.00009800  |
| N | 0.73074200  | 0.84230000  | 0.00005700  |
| H | 1.39658300  | 1.59721200  | 0.00011100  |
| H | 2.03010100  | -0.89228000 | -0.00010300 |
| H | -2.16571500 | -0.65619300 | -0.00002800 |
| H | -1.15314700 | 1.92156800  | 0.00019100  |
| N | -0.08581100 | -1.23968800 | -0.00010700 |

#### 1-methylimidazole

|   |             |             |             |
|---|-------------|-------------|-------------|
| C | 0.19401100  | 1.10190200  | 0.00079400  |
| C | 1.51483000  | -0.61831900 | -0.00009000 |
| C | 0.22559200  | -1.12167100 | 0.00047900  |
| N | -0.61546000 | -0.01506800 | -0.00009100 |
| H | -0.19859800 | 2.10600100  | 0.00093500  |
| H | 2.44596200  | -1.15970200 | -0.00042100 |
| H | -0.15005700 | -2.13109900 | 0.00068600  |
| N | 1.48564400  | 0.77458100  | -0.00063900 |
| C | -2.07377800 | -0.03495300 | -0.00033000 |
| H | -2.45270300 | -0.54366700 | -0.89081000 |
| H | -2.45297600 | -0.54125700 | 0.89140500  |
| H | -2.44684900 | 0.99137300  | -0.00180800 |

#### 2-methylimidazole

|   |             |             |             |
|---|-------------|-------------|-------------|
| C | -0.63277400 | -0.07047400 | 0.00003200  |
| C | 1.44827800  | -0.73154400 | 0.00001400  |
| C | 1.49555400  | 0.64838800  | -0.00022700 |
| N | 0.16476600  | 1.05989900  | 0.00000500  |
| H | -0.16160700 | 2.01232500  | 0.00001100  |
| H | 2.26741400  | -1.43061600 | 0.00003500  |
| H | 2.31949100  | 1.34064700  | -0.00038900 |
| N | 0.12250200  | -1.16948800 | 0.00004900  |
| C | -2.12772500 | -0.02535500 | 0.00011000  |
| H | -2.51757900 | 0.48438700  | 0.88815400  |
| H | -2.51767100 | 0.48440200  | -0.88788500 |
| H | -2.50092200 | -1.05011300 | 0.00012000  |

#### Benzimidazole

|   |             |             |             |
|---|-------------|-------------|-------------|
| C | -0.92804200 | 1.44061700  | 0.00003500  |
| C | 0.25866700  | 0.69167800  | 0.00001500  |
| C | 0.26079600  | -0.72813900 | -0.00001600 |
| C | -0.95319900 | -1.43523900 | -0.00002800 |
| C | -2.13908100 | -0.69817400 | -0.00000600 |
| C | -2.12533100 | 0.72063100  | 0.00002500  |
| H | -0.92595800 | 2.52516100  | 0.00005700  |
| H | -0.95370800 | -2.51890400 | -0.00005800 |
| H | -3.09260000 | -1.21528600 | -0.00001600 |

|   |             |             |             |
|---|-------------|-------------|-------------|
| H | -3.06844600 | 1.25710700  | 0.00004000  |
| N | 1.58492500  | -1.20866600 | -0.00004700 |
| N | 1.60637300  | 1.05170200  | 0.00001200  |
| H | 1.98152700  | 1.98520500  | 0.00006100  |
| C | 2.34269300  | -0.12560100 | 0.00000200  |
| H | 3.42107800  | -0.12916700 | -0.00000200 |

### 2-iodo-1-methylimidazole

|   |             |             |             |
|---|-------------|-------------|-------------|
| C | -0.65839300 | -0.36087600 | -0.00031600 |
| C | -2.61986700 | -1.27417500 | -0.00075300 |
| C | -2.83028400 | 0.09210100  | -0.00002600 |
| N | -1.56915700 | 0.68010000  | -0.00037800 |
| H | -3.34597500 | -2.06869800 | -0.00107600 |
| H | -3.73398400 | 0.67718200  | 0.00005300  |
| N | -1.25376500 | -1.54588100 | 0.00043200  |
| I | 1.41195500  | -0.06425300 | 0.00018800  |
| C | -1.28199200 | 2.11204800  | -0.00030200 |
| H | -0.71320900 | 2.39137600  | 0.89038300  |
| H | -0.71177400 | 2.39118800  | -0.89012500 |
| H | -2.22501500 | 2.66024700  | -0.00116900 |

### Styrene Oxide

|   |             |             |             |
|---|-------------|-------------|-------------|
| C | -2.58669700 | 0.02538400  | 0.76796800  |
| H | -2.22608100 | -0.66180400 | 1.52803800  |
| H | -3.49246200 | 0.57392200  | 1.00635000  |
| C | -1.60030800 | 0.59978800  | -0.19725300 |
| H | -1.84069900 | 1.56140400  | -0.64363500 |
| O | -2.51534500 | -0.49119900 | -0.62069500 |
| C | -0.14570700 | 0.27249800  | -0.11555500 |
| C | 0.29338800  | -1.06249100 | -0.07469900 |
| C | 0.79843900  | 1.31226600  | -0.06247500 |
| C | 1.66019200  | -1.35101300 | 0.03377800  |
| H | -0.43749800 | -1.86113100 | -0.15355300 |
| C | 2.16593100  | 1.02319000  | 0.04863300  |
| H | 0.46740000  | 2.34651500  | -0.10732000 |
| C | 2.60020400  | -0.31012800 | 0.09997900  |
| H | 1.99304500  | -2.38345300 | 0.05978400  |
| H | 2.88806100  | 1.83193000  | 0.09011200  |
| H | 3.65835500  | -0.53475500 | 0.18352700  |

### Carbon Dioxide

|   |            |            |             |
|---|------------|------------|-------------|
| C | 0.00000000 | 0.00000000 | 0.00000000  |
| O | 0.00000000 | 0.00000000 | 1.18670700  |
| O | 0.00000000 | 0.00000000 | -1.18670700 |

### TS1 HIm LS

|   |            |             |             |
|---|------------|-------------|-------------|
| C | 0.75653700 | 0.87739800  | -0.82744200 |
| H | 0.48803000 | 0.52392800  | -1.81494600 |
| H | 1.28897400 | 1.81482900  | -0.72846300 |
| C | 0.94217900 | -0.13479300 | 0.23911700  |

|   |             |             |             |
|---|-------------|-------------|-------------|
| H | 1.08864800  | 0.29550000  | 1.23424800  |
| O | 2.17580900  | -0.31792900 | -0.49589300 |
| C | 3.76386500  | 0.68682600  | 0.30076000  |
| O | 3.21129800  | 1.50005700  | 1.01244300  |
| O | 4.68166700  | 0.12929700  | -0.23213600 |
| C | -2.27662900 | 1.11782100  | -0.77283200 |
| C | -1.31464800 | 2.89397000  | 0.08460800  |
| C | -3.28815800 | 1.90198300  | -0.26049200 |
| H | -2.33439600 | 0.15599600  | -1.25233000 |
| H | -0.58092000 | 3.61092200  | 0.41037200  |
| H | -4.35339100 | 1.75712200  | -0.23130700 |
| H | -3.12229600 | 3.79520200  | 0.73711300  |
| N | -2.66373400 | 3.02311500  | 0.28017800  |
| N | -1.05840900 | 1.75399900  | -0.55350300 |
| C | 0.00695400  | -1.31409800 | 0.24416100  |
| C | -1.02987300 | -1.39617900 | 1.18884000  |
| C | 0.14058900  | -2.32149600 | -0.72567500 |
| C | -1.93962400 | -2.46324800 | 1.15368300  |
| H | -1.12461500 | -0.62763300 | 1.95175000  |
| C | -0.76750200 | -3.38956300 | -0.76166000 |
| H | 0.97266700  | -2.26085000 | -1.41964300 |
| C | -1.81297400 | -3.46089400 | 0.17380700  |
| H | -2.73522200 | -2.52230900 | 1.88971700  |
| H | -0.65524700 | -4.16929500 | -1.50817600 |
| H | -2.51171400 | -4.29099100 | 0.14837500  |

## TS1 HIm MS

|   |             |             |             |
|---|-------------|-------------|-------------|
| C | 0.60669800  | 1.11042900  | 1.31461800  |
| H | 0.08321200  | 1.00232500  | 2.26310700  |
| H | 1.67985700  | 0.96665200  | 1.41983700  |
| C | -0.00089300 | 0.48345400  | 0.13152100  |
| H | 0.58768700  | 0.55091200  | -0.77211300 |
| O | 0.24834900  | 2.35127700  | 0.63027500  |
| C | 1.58652000  | 2.97618000  | -0.37074400 |
| O | 2.39749000  | 2.05117800  | -0.52531400 |
| O | 1.30794300  | 4.12816000  | -0.62909800 |
| C | 0.83952600  | -2.87802400 | 0.32025200  |
| C | 2.35159000  | -1.35880600 | -0.13928000 |
| C | 2.02864300  | -3.55516200 | 0.13243800  |
| H | -0.13433000 | -3.26989600 | 0.55761500  |
| H | 2.83292800  | -0.41124300 | -0.33748800 |
| H | 2.26646000  | -4.60324000 | 0.17978300  |
| H | 3.95278500  | -2.73473500 | -0.35106700 |
| N | 2.97643700  | -2.57809400 | -0.15835100 |
| N | 1.05800600  | -1.51588300 | 0.14929000  |
| C | -1.41647600 | 0.11494900  | 0.00499900  |
| C | -1.84949800 | -0.45329000 | -1.20983700 |
| C | -2.34348500 | 0.30037200  | 1.04814700  |
| C | -3.18058800 | -0.84672100 | -1.37585000 |
| H | -1.13432900 | -0.59404900 | -2.01473500 |
| C | -3.67886400 | -0.08246100 | 0.87835000  |
| H | -2.03641800 | 0.77022800  | 1.97556900  |
| C | -4.09920000 | -0.66080800 | -0.32986800 |
| H | -3.50489500 | -1.28578400 | -2.31277600 |
| H | -4.39260300 | 0.07567500  | 1.67934100  |

|   |             |             |             |
|---|-------------|-------------|-------------|
| H | -5.13555700 | -0.95459400 | -0.45902000 |
|---|-------------|-------------|-------------|

### Intermediate 1 HIm LS

|   |             |             |             |
|---|-------------|-------------|-------------|
| C | -0.61842300 | -0.10071200 | -1.04676200 |
| H | -0.02639000 | -0.77038100 | -1.67297100 |
| H | -1.02003600 | 0.70546100  | -1.66225700 |
| C | 0.25111600  | 0.53664100  | 0.09175400  |
| H | -0.25755100 | 0.34970400  | 1.04783400  |
| O | 0.38138100  | 1.94198700  | -0.12743100 |
| C | -0.80768300 | 2.78279800  | 0.15781900  |
| O | -1.84132100 | 2.10550800  | 0.52087100  |
| O | -0.61531700 | 3.99131100  | -0.01534000 |
| C | -1.96721800 | -2.25904600 | -0.68295900 |
| C | -2.73447000 | -0.36554600 | 0.23688000  |
| C | -3.12183000 | -2.56910200 | -0.01308600 |
| H | -1.29895100 | -2.88246200 | -1.25000500 |
| H | -2.70553600 | 0.70895200  | 0.51002200  |
| H | -3.63431900 | -3.50646100 | 0.10418100  |
| H | -4.40644700 | -1.26106800 | 1.11168200  |
| N | -3.57768800 | -1.37464000 | 0.54880100  |
| N | -1.75103700 | -0.89113200 | -0.51684000 |
| C | 1.63576700  | -0.08972300 | 0.12871300  |
| C | 1.77249500  | -1.43102000 | 0.53127600  |
| C | 2.77350500  | 0.63756500  | -0.24925100 |
| C | 3.03194000  | -2.04557200 | 0.54534300  |
| H | 0.89753600  | -1.99304100 | 0.85498000  |
| C | 4.03494800  | 0.02187000  | -0.23540700 |
| H | 2.65204100  | 1.67613400  | -0.53213200 |
| C | 4.16886500  | -1.31838500 | 0.15716100  |
| H | 3.12969800  | -3.07778900 | 0.86645700  |
| H | 4.91222700  | 0.59080200  | -0.52551700 |
| H | 5.14677900  | -1.78849100 | 0.17031500  |

### Intermediate 1 HIm MS

|   |             |             |             |
|---|-------------|-------------|-------------|
| C | -0.66586300 | -1.43487100 | 0.01116500  |
| H | -0.11340700 | -2.36790100 | -0.14296000 |
| H | -0.76900800 | -1.26364100 | 1.08989500  |
| C | 0.17253500  | -0.32364400 | -0.65287200 |
| H | 0.08649000  | -0.46809000 | -1.73477700 |
| O | -1.94192800 | -1.55883500 | -0.62949300 |
| C | -3.18317400 | -1.36460700 | 0.17982700  |
| O | -2.98981500 | -0.66269500 | 1.24786800  |
| O | -4.18973600 | -1.86574000 | -0.32862700 |
| C | 0.17079100  | 2.20637600  | -0.91849400 |
| C | -1.42640500 | 1.34208400  | 0.39912900  |
| C | -0.58899200 | 3.24963600  | -0.46690600 |
| H | 1.03591000  | 2.19429100  | -1.55739600 |
| H | -2.09545400 | 0.58538500  | 0.91818500  |
| H | -0.51160800 | 4.30551400  | -0.65237100 |
| H | -2.31045900 | 3.18064000  | 0.82427000  |
| N | -1.57125400 | 2.68592700  | 0.34933700  |
| N | -0.36595700 | 1.03724300  | -0.37253700 |
| C | 1.63045600  | -0.39865300 | -0.22967600 |

|   |            |             |             |
|---|------------|-------------|-------------|
| C | 2.59610800 | -0.87875200 | -1.12733500 |
| C | 2.01605700 | -0.04141100 | 1.07466900  |
| C | 3.93581300 | -1.00192100 | -0.72857900 |
| H | 2.30348600 | -1.16394200 | -2.13417300 |
| C | 3.35302700 | -0.16070500 | 1.47335400  |
| H | 1.27470400 | 0.32646500  | 1.77922700  |
| C | 4.31664200 | -0.64196600 | 0.57202800  |
| H | 4.67551800 | -1.37648500 | -1.42775400 |
| H | 3.64257700 | 0.11247600  | 2.48238600  |
| H | 5.35160000 | -0.73813400 | 0.88202000  |

## TS2 HIm LS

|   |             |             |             |
|---|-------------|-------------|-------------|
| C | 0.11384100  | -1.38527800 | -0.54622000 |
| H | 0.10189400  | -0.96286000 | -1.54095700 |
| H | 0.33252700  | -2.44322000 | -0.45628600 |
| C | -0.49948200 | -0.63461400 | 0.65981200  |
| H | 0.18035200  | -0.72205100 | 1.51078700  |
| O | -1.71324000 | -1.28607700 | 1.10580200  |
| C | -2.43314900 | -1.96304200 | 0.04324300  |
| O | -1.72309200 | -1.97923900 | -1.05566700 |
| O | -3.54394100 | -2.42293600 | 0.31127400  |
| C | 2.43755900  | 0.36646600  | -0.64511000 |
| C | 2.87182300  | -1.60494500 | 0.23538500  |
| C | 3.78216400  | 0.35150500  | -0.34815400 |
| H | 1.83506900  | 1.14834500  | -1.07395100 |
| H | 2.76886400  | -2.60827000 | 0.61074400  |
| H | 4.54361800  | 1.09932900  | -0.47898500 |
| H | 4.93432100  | -1.23093000 | 0.53197300  |
| N | 4.03938100  | -0.89894100 | 0.20792400  |
| N | 1.89316300  | -0.85840000 | -0.27352200 |
| C | -0.72216500 | 0.83628600  | 0.34747700  |
| C | -0.14413800 | 1.82151500  | 1.16180300  |
| C | -1.50544400 | 1.22619800  | -0.75560400 |
| C | -0.33224200 | 3.18347600  | 0.87971900  |
| H | 0.44607900  | 1.52583500  | 2.02548400  |
| C | -1.69541800 | 2.58475500  | -1.03785000 |
| H | -1.97028100 | 0.46609400  | -1.37690100 |
| C | -1.10709200 | 3.56789500  | -0.22422500 |
| H | 0.11329900  | 3.93694800  | 1.52112300  |
| H | -2.30791400 | 2.87724900  | -1.88425900 |
| H | -1.26098700 | 4.61964500  | -0.44251200 |

## TS2 HIm MS

|   |             |             |             |
|---|-------------|-------------|-------------|
| C | -0.32387400 | -1.83317400 | -0.53981700 |
| H | 0.25817800  | -1.66413300 | -1.44825000 |
| H | -0.03794800 | -2.79614600 | -0.09955700 |
| C | -0.05744000 | -0.72606000 | 0.49486000  |
| H | 0.14174300  | -1.00402500 | 1.51996000  |
| O | -1.69742900 | -1.86443600 | -0.96330300 |
| C | -2.62377100 | -1.60277300 | 0.13779400  |
| O | -1.97439700 | -1.20413500 | 1.19524300  |
| O | -3.82358700 | -1.77175700 | -0.09082000 |
| C | 2.76685300  | -1.55766100 | 0.41693300  |
| C | 2.46682700  | 0.48546700  | -0.34653300 |



|   |             |             |             |
|---|-------------|-------------|-------------|
| C | 4.01119400  | -1.07856000 | 0.07307000  |
| H | 2.49324700  | -2.51287300 | 0.82989000  |
| H | 2.00828000  | 1.41224800  | -0.64705500 |
| H | 4.98513900  | -1.53112300 | 0.12995500  |
| H | 4.51439700  | 0.84224300  | -0.74100400 |
| N | 3.80276800  | 0.21111200  | -0.40732100 |
| N | 1.82365600  | -0.57155600 | 0.14740000  |
| C | -0.43807600 | 0.69391300  | 0.23280400  |
| C | -0.36433300 | 1.62729400  | 1.28135500  |
| C | -0.82655300 | 1.12267500  | -1.04888100 |
| C | -0.66626500 | 2.97451000  | 1.05485000  |
| H | -0.09696100 | 1.28869100  | 2.27754600  |
| C | -1.13079100 | 2.47250700  | -1.27532600 |
| H | -0.93318000 | 0.40444000  | -1.85445000 |
| C | -1.04575900 | 3.40245600  | -0.22850900 |
| H | -0.62245400 | 3.68507800  | 1.87329400  |
| H | -1.45026700 | 2.79294200  | -2.26117700 |
| H | -1.28991600 | 4.44484900  | -0.40426700 |

### Product HIm

|   |             |             |             |
|---|-------------|-------------|-------------|
| C | -0.69299600 | -1.56806300 | -0.50772500 |
| H | -0.15912300 | -1.10954100 | -1.33584600 |
| H | -0.19388700 | -2.48452400 | -0.19719600 |
| C | -0.92515500 | -0.60007600 | 0.67927400  |
| H | -0.32713500 | -0.88808500 | 1.53917700  |
| O | -2.34415400 | -0.86684000 | 1.02602400  |
| C | -2.97606500 | -1.55562700 | 0.00783700  |
| O | -2.05042900 | -1.90251400 | -0.96472200 |
| O | -4.16216000 | -1.81701300 | -0.03496100 |
| C | 2.61178100  | 0.04989200  | -0.48471700 |
| C | 3.20120700  | -1.76743500 | 0.56064000  |
| C | 3.94331600  | -0.15114600 | -0.78983800 |
| H | 1.96353200  | 0.85015800  | -0.80151500 |
| H | 3.20365500  | -2.65688200 | 1.16759800  |
| H | 4.62889300  | 0.41056400  | -1.39974600 |
| H | 5.21972200  | -1.74201100 | -0.12479600 |
| N | 4.30933000  | -1.31195100 | -0.11732200 |
| N | 2.15699600  | -0.96629500 | 0.36069400  |
| C | -0.73458400 | 0.86365000  | 0.36275100  |
| C | 0.07030100  | 1.65855600  | 1.19112000  |
| C | -1.35514500 | 1.44304000  | -0.75939300 |
| C | 0.26073800  | 3.01829800  | 0.90381600  |
| H | 0.56072800  | 1.21053600  | 2.04958100  |
| C | -1.16812000 | 2.80019200  | -1.04784800 |
| H | -1.98626800 | 0.83996500  | -1.40729200 |
| C | -0.35824500 | 3.59182500  | -0.21650100 |
| H | 0.88651000  | 3.62471500  | 1.54990600  |
| H | -1.65368900 | 3.24094600  | -1.91195800 |
| H | -0.21547100 | 4.64417700  | -0.43872000 |

### TS1 1M-Im LS

|   |             |             |             |
|---|-------------|-------------|-------------|
| C | -0.53526800 | -1.00645000 | -0.90840100 |
| H | -0.55693600 | -0.53093100 | -1.88057200 |
| H | -0.46192600 | -2.08462300 | -0.84753700 |
| C | -1.16756100 | -0.29217000 | 0.22467700  |

|   |             |             |             |
|---|-------------|-------------|-------------|
| H | -0.99383200 | -0.76344400 | 1.19654900  |
| O | -2.34475500 | -0.79105600 | -0.45546300 |
| C | -3.08446300 | -2.53029400 | 0.34282000  |
| O | -2.13488000 | -2.92742800 | 0.98460700  |
| O | -4.18770700 | -2.54432700 | -0.12495100 |
| C | 2.16662700  | 0.42484300  | -0.97012900 |
| C | 2.34444900  | -1.59946200 | -0.15381000 |
| C | 3.45997600  | 0.29232500  | -0.50817800 |
| H | 1.68390600  | 1.27783700  | -1.41511400 |
| H | 2.12336600  | -2.60420600 | 0.16516300  |
| H | 4.28432400  | 0.98428500  | -0.49840500 |
| N | 3.56200300  | -0.99604200 | 0.00928800  |
| N | 1.48777300  | -0.76628100 | -0.74598300 |
| C | -1.02628600 | 1.20557000  | 0.26693600  |
| C | -0.12474600 | 1.81011800  | 1.15917200  |
| C | -1.76784800 | 2.00719800  | -0.61647700 |
| C | 0.05123300  | 3.20157900  | 1.15662700  |
| H | 0.43816400  | 1.19331000  | 1.85515200  |
| C | -1.59405000 | 3.39886600  | -0.61941500 |
| H | -2.48662600 | 1.52315200  | -1.26962900 |
| C | -0.68095000 | 3.99954800  | 0.26282100  |
| H | 0.74662000  | 3.66176800  | 1.85156900  |
| H | -2.17491200 | 4.01441800  | -1.29885900 |
| H | -0.55120200 | 5.07713000  | 0.26302800  |
| C | 4.75471000  | -1.58989700 | 0.61273800  |
| H | 5.56271000  | -1.64760000 | -0.12003000 |
| H | 5.08148900  | -0.99469100 | 1.46825300  |
| H | 4.52022400  | -2.59830100 | 0.95746000  |

#### TS1 1M-Im MS

|   |             |             |             |
|---|-------------|-------------|-------------|
| C | -0.34396500 | 1.31568300  | 1.29101900  |
| H | -0.70466000 | 0.92089200  | 2.24013400  |
| H | 0.63027200  | 1.79215200  | 1.38321200  |
| C | -0.52679000 | 0.47508700  | 0.09951900  |
| H | -0.05866900 | 0.84812800  | -0.80097800 |
| O | -1.33876500 | 2.14663600  | 0.61721700  |
| C | -0.57057000 | 3.45684700  | -0.38544600 |
| O | 0.61021600  | 3.13140800  | -0.54514900 |
| O | -1.45523400 | 4.25221000  | -0.61189900 |
| C | 1.74277300  | -2.04952400 | 0.35847100  |
| C | 2.44461000  | -0.02140000 | -0.06689100 |
| C | 3.12011900  | -2.11555600 | 0.26442300  |
| H | 1.03298400  | -2.83520300 | 0.55344200  |
| H | 2.46683100  | 1.03910000  | -0.27071700 |
| H | 3.80241600  | -2.94245900 | 0.36387700  |
| N | 3.55448300  | -0.82113200 | -0.00639700 |
| N | 1.33943800  | -0.73851300 | 0.15046300  |
| C | -1.55355500 | -0.57576700 | -0.02452400 |
| C | -1.54730200 | -1.39121900 | -1.17267800 |
| C | -2.53252000 | -0.78445300 | 0.96395300  |
| C | -2.48889200 | -2.41461600 | -1.32175400 |
| H | -0.79314000 | -1.22788500 | -1.93669300 |
| C | -3.48230800 | -1.80147300 | 0.80972500  |
| H | -2.58212900 | -0.12977800 | 1.82664900  |
| C | -3.45966000 | -2.62252300 | -0.32831500 |

|   |             |             |             |
|---|-------------|-------------|-------------|
| H | -2.47451800 | -3.03999500 | -2.20779700 |
| H | -4.24415500 | -1.94711000 | 1.56779300  |
| H | -4.19816700 | -3.40863800 | -0.44562600 |
| C | 4.94118200  | -0.39634700 | -0.19368600 |
| H | 5.38295200  | -0.90612000 | -1.05298700 |
| H | 4.96538900  | 0.67954100  | -0.37386300 |
| H | 5.52867700  | -0.61558600 | 0.70084300  |

### Intermediate 1 1M-Im LS

|   |             |             |             |
|---|-------------|-------------|-------------|
| C | 0.24242600  | -0.02753400 | -1.16278900 |
| H | -0.32474900 | 0.67856000  | -1.77197900 |
| H | 0.52924300  | -0.88228500 | -1.77708300 |
| C | -0.60803000 | -0.55476000 | 0.04398900  |
| H | -0.02128200 | -0.39981900 | 0.96016200  |
| O | -0.88574300 | -1.94538000 | -0.12904300 |
| C | 0.23176100  | -2.89160100 | 0.11280600  |
| O | 1.34453300  | -2.31159000 | 0.40153800  |
| O | -0.08606000 | -4.07940400 | -0.01782000 |
| C | 1.80881900  | 1.99961200  | -0.93942400 |
| C | 2.44759400  | 0.06735200  | -0.01250100 |
| C | 3.02637400  | 2.20487200  | -0.34282100 |
| H | 1.17301000  | 2.67492800  | -1.48417900 |
| H | 2.33756300  | -0.99061800 | 0.29310300  |
| H | 3.63469900  | 3.08952100  | -0.27935800 |
| N | 3.40525300  | 0.98740500  | 0.22866300  |
| N | 1.47199400  | 0.66617400  | -0.72470500 |
| C | -1.92103900 | 0.20345700  | 0.15356800  |
| C | -1.90155800 | 1.56172200  | 0.52084900  |
| C | -3.14652400 | -0.41941600 | -0.12318000 |
| C | -3.09292200 | 2.29547800  | 0.59994700  |
| H | -0.95645200 | 2.04454800  | 0.76528100  |
| C | -4.33982400 | 0.31564000  | -0.04418100 |
| H | -3.14427900 | -1.47158600 | -0.38069200 |
| C | -4.31824100 | 1.67220500  | 0.31311500  |
| H | -3.06942200 | 3.34038900  | 0.89294700  |
| H | -5.28527300 | -0.17289600 | -0.25633600 |
| H | -5.24379800 | 2.23509700  | 0.37673200  |
| C | 4.63982800  | 0.73522900  | 0.97938800  |
| H | 5.50739300  | 0.90760400  | 0.33974400  |
| H | 4.68650000  | 1.39120700  | 1.85056200  |
| H | 4.64230000  | -0.30223800 | 1.31339100  |

### Intermediate 1 1M-Im MS

|   |             |             |             |
|---|-------------|-------------|-------------|
| C | 0.13738500  | 1.28162400  | 1.12861500  |
| H | -0.59139100 | 1.25724100  | 1.94178700  |
| H | 1.12273900  | 1.01378300  | 1.52655700  |
| C | -0.23452500 | 0.26636300  | 0.00351500  |
| H | 0.00070600  | 0.76830700  | -0.93888200 |
| O | 0.14655200  | 2.62051500  | 0.62425500  |
| C | 1.28733100  | 2.95548200  | -0.27383300 |
| O | 2.03521400  | 1.94168400  | -0.55128600 |
| O | 1.32032600  | 4.14293500  | -0.61726300 |
| C | 0.58340500  | -2.10729000 | 0.70879800  |
| C | 1.99496900  | -0.73636000 | -0.34910500 |
| C | 1.80224700  | -2.73127100 | 0.63910300  |

|   |             |             |             |
|---|-------------|-------------|-------------|
| H | -0.34386300 | -2.43318200 | 1.14430400  |
| H | 2.35468400  | 0.22431200  | -0.74028500 |
| H | 2.11480300  | -3.69531000 | 0.99938700  |
| N | 2.66884500  | -1.85853100 | -0.02415300 |
| N | 0.72219200  | -0.87621100 | 0.07379000  |
| C | -1.68788100 | -0.18403600 | -0.05034900 |
| C | -2.07067300 | -1.35919000 | -0.72597700 |
| C | -2.69123000 | 0.65992700  | 0.45761700  |
| C | -3.42171900 | -1.71071600 | -0.84326700 |
| H | -1.32009500 | -1.99791300 | -1.18296700 |
| C | -4.04357800 | 0.31177100  | 0.33449400  |
| H | -2.42682800 | 1.60597300  | 0.91648600  |
| C | -4.41490500 | -0.87900900 | -0.30540600 |
| H | -3.69773100 | -2.62161200 | -1.36414600 |
| H | -4.80415600 | 0.97816500  | 0.72671400  |
| H | -5.46202000 | -1.14549700 | -0.40056500 |
| C | 4.08767400  | -2.09973100 | -0.30610300 |
| H | 4.19468900  | -2.91412200 | -1.02522100 |
| H | 4.52358900  | -1.19204000 | -0.72344200 |
| H | 4.60986700  | -2.35135700 | 0.61855400  |

## TS2 1M-Im LS

|   |             |             |             |
|---|-------------|-------------|-------------|
| C | -0.07009300 | -1.31442900 | -0.60913500 |
| H | -0.18124300 | -0.88463000 | -1.59435500 |
| H | 0.31397100  | -2.32588400 | -0.54489100 |
| C | -0.72712100 | -0.67115200 | 0.63497900  |
| H | -0.00401100 | -0.67029500 | 1.45379800  |
| O | -1.81667700 | -1.49300300 | 1.12076700  |
| C | -2.47050700 | -2.26116000 | 0.08019900  |
| O | -1.80986800 | -2.16612900 | -1.04603200 |
| O | -3.49083000 | -2.88141500 | 0.38300000  |
| C | 1.98043000  | 0.75996400  | -0.78391400 |
| C | 2.72828300  | -1.12136100 | 0.07185300  |
| C | 3.32378100  | 0.93509100  | -0.53098300 |
| H | 1.25895700  | 1.44897600  | -1.18803700 |
| H | 2.78555300  | -2.12907200 | 0.44703100  |
| H | 3.96659400  | 1.78444000  | -0.68389500 |
| N | 3.78531000  | -0.26133100 | 0.01139300  |
| N | 1.63052100  | -0.52755000 | -0.40042200 |
| C | -1.17077100 | 0.75578600  | 0.35731600  |
| C | -0.69646000 | 1.80638600  | 1.15657500  |
| C | -2.05657900 | 1.03961900  | -0.69956400 |
| C | -1.08899200 | 3.13019000  | 0.90481000  |
| H | -0.02586000 | 1.59035200  | 1.98438900  |
| C | -2.45058500 | 2.35972300  | -0.95155600 |
| H | -2.43975700 | 0.22657500  | -1.30943900 |
| C | -1.96599200 | 3.40976900  | -0.15327400 |
| H | -0.72141500 | 3.93414600  | 1.53426900  |
| H | -3.14038700 | 2.56929900  | -1.76236400 |
| H | -2.27749500 | 4.43087400  | -0.34792400 |
| C | 5.16016200  | -0.54098600 | 0.43144400  |
| H | 5.83812400  | -0.45979500 | -0.42058100 |
| H | 5.46519300  | 0.16137700  | 1.20970600  |
| H | 5.21662600  | -1.55446400 | 0.83112400  |

## TS2 1M-Im MS

|   |             |             |             |
|---|-------------|-------------|-------------|
| C | -0.82365100 | -1.81359100 | -0.55170800 |
| H | -0.17639300 | -1.69281100 | -1.42260100 |
| H | -0.67214300 | -2.81133500 | -0.12252100 |
| C | -0.49440900 | -0.76458600 | 0.52397600  |
| H | -0.37700500 | -1.08197400 | 1.55005700  |
| O | -2.16782100 | -1.68128600 | -1.04710700 |
| C | -3.11318000 | -1.32794300 | 0.00846700  |
| O | -2.47814500 | -1.01720900 | 1.10461500  |
| O | -4.31159600 | -1.35574000 | -0.28016300 |
| C | 2.22580000  | -1.91200900 | 0.58551000  |
| C | 2.20466800  | 0.14852100  | -0.17830500 |
| C | 3.53157600  | -1.57353500 | 0.30364300  |
| H | 1.82700900  | -2.83064000 | 0.97961700  |
| H | 1.87070900  | 1.12239900  | -0.49562900 |
| H | 4.44616700  | -2.13187700 | 0.40475500  |
| N | 3.50379900  | -0.26804500 | -0.17852400 |
| N | 1.41623000  | -0.82718700 | 0.27740100  |
| C | -0.68452000 | 0.69528400  | 0.27297100  |
| C | -0.54847900 | 1.59838200  | 1.34138300  |
| C | -0.95491200 | 1.18592200  | -1.01674700 |
| C | -0.67484500 | 2.97527500  | 1.12761500  |
| H | -0.37034500 | 1.21571700  | 2.34150100  |
| C | -1.08247000 | 2.56566000  | -1.23087700 |
| H | -1.10891800 | 0.49600100  | -1.83936400 |
| C | -0.93741400 | 3.46408800  | -0.16325700 |
| H | -0.58546700 | 3.66395100  | 1.96101900  |
| H | -1.31195700 | 2.93609000  | -2.22427800 |
| H | -1.04822300 | 4.53049900  | -0.32954200 |
| C | 4.66314200  | 0.51385300  | -0.61330900 |
| H | 4.33996000  | 1.52338400  | -0.87081400 |
| H | 5.39758300  | 0.57503600  | 0.19217100  |
| H | 5.12147700  | 0.05414400  | -1.49142700 |

## TS1 2M-HIm LS

|   |             |             |             |
|---|-------------|-------------|-------------|
| C | -0.87672700 | 0.34088800  | 1.06201400  |
| H | -0.49899600 | -0.05514400 | 1.99628300  |
| H | -1.59800800 | 1.14517000  | 1.08416000  |
| C | -0.81234600 | -0.52564800 | -0.13440900 |
| H | -1.02415400 | -0.01194400 | -1.07701300 |
| O | -1.99686300 | -1.04759400 | 0.51750700  |
| C | -3.72599500 | -0.21195000 | -0.22914100 |
| O | -3.29812000 | 0.79160500  | -0.76220900 |
| O | -4.54348400 | -1.00330100 | 0.14165000  |
| C | 2.00908700  | 1.50368900  | 1.20352800  |
| C | 0.63222000  | 2.65075600  | -0.08210300 |
| C | 2.79125000  | 2.38733400  | 0.49493200  |
| H | 2.30510300  | 0.75282500  | 1.91490000  |
| H | 3.85389000  | 2.55232400  | 0.48869700  |
| H | 2.15901500  | 3.83581000  | -0.95861900 |
| N | 1.90920100  | 3.10400600  | -0.31245800 |
| N | 0.67645100  | 1.68489000  | 0.84154800  |
| C | 0.34930800  | -1.47621100 | -0.24141200 |
| C | 1.47097000  | -1.13663400 | -1.01732000 |
| C | 0.33373900  | -2.69223000 | 0.45968000  |

|   |             |             |             |
|---|-------------|-------------|-------------|
| C | 2.57554400  | -1.99745200 | -1.08099800 |
| H | 1.47959500  | -0.20116100 | -1.57195500 |
| C | 1.43718000  | -3.55600000 | 0.39358000  |
| H | -0.55340900 | -2.94534800 | 1.03052600  |
| C | 2.56156400  | -3.21005300 | -0.37275800 |
| H | 3.43799600  | -1.72989500 | -1.68334800 |
| H | 1.41790400  | -4.49852200 | 0.93130400  |
| H | 3.41311800  | -3.88092500 | -0.42530700 |
| C | -0.58861100 | 3.18991400  | -0.75783500 |
| H | -1.04776800 | 3.98376900  | -0.15992500 |
| H | -0.34250300 | 3.60176100  | -1.74083800 |
| H | -1.33670400 | 2.40490100  | -0.89463000 |

### TS1 2M-HIm MS

|   |             |             |             |
|---|-------------|-------------|-------------|
| C | 0.89325700  | -0.96194200 | -1.31330700 |
| H | 0.38861800  | -0.87313600 | -2.27396200 |
| H | 1.92477300  | -0.61533000 | -1.35413200 |
| C | 0.15014600  | -0.58194300 | -0.10578900 |
| H | 0.73674100  | -0.54870000 | 0.80212000  |
| O | 0.74114100  | -2.29105300 | -0.72322000 |
| C | 2.18384400  | -2.80101300 | 0.27602500  |
| O | 2.81770700  | -1.77165600 | 0.51968700  |
| O | 2.07026500  | -3.99790700 | 0.41198300  |
| C | -0.55511400 | 2.61797900  | -0.27110500 |
| C | 1.58774800  | 2.27189400  | 0.10753000  |
| C | 0.02841900  | 3.86405000  | -0.20918600 |
| H | -1.58670600 | 2.35346300  | -0.43306300 |
| H | -0.38593700 | 4.85175000  | -0.30864700 |
| H | 2.09463600  | 4.33549700  | 0.13580200  |
| N | 1.38157800  | 3.63135200  | 0.03069800  |
| N | 0.42209400  | 1.64533100  | -0.07465400 |
| C | -1.31788100 | -0.58817600 | 0.01829400  |
| C | -1.88250800 | -0.34565300 | 1.28497300  |
| C | -2.16690900 | -0.80005400 | -1.08336300 |
| C | -3.27100700 | -0.30697000 | 1.45031000  |
| H | -1.22860700 | -0.18098200 | 2.13607900  |
| C | -3.55674900 | -0.76662000 | -0.91898600 |
| H | -1.75008200 | -1.01373400 | -2.06102200 |
| C | -4.11244200 | -0.51734200 | 0.34600200  |
| H | -3.69621200 | -0.12227200 | 2.43063900  |
| H | -4.20558500 | -0.94254200 | -1.77009400 |
| H | -5.18984800 | -0.49516200 | 0.47167900  |
| C | 2.92300100  | 1.64342700  | 0.35389800  |
| H | 3.59601100  | 1.80241300  | -0.49565900 |
| H | 3.39676400  | 2.06560200  | 1.24614500  |
| H | 2.82398800  | 0.56547000  | 0.50243100  |

### Intermediate 1 2M-HIm LS

|   |             |             |             |
|---|-------------|-------------|-------------|
| C | -0.68410700 | -0.16847700 | 1.03486300  |
| H | -0.06200400 | -0.08132300 | 1.92793900  |
| H | -1.55745800 | -0.78459100 | 1.24794000  |
| C | 0.10698800  | -0.83976700 | -0.13001800 |
| H | -0.43349400 | -0.62073000 | -1.06106800 |
| O | 0.12630500  | -2.24433400 | 0.11845400  |

|   |             |             |             |
|---|-------------|-------------|-------------|
| C | -1.16457000 | -2.96762200 | -0.18942300 |
| O | -2.09631600 | -2.18227100 | -0.58384900 |
| O | -1.09060800 | -4.18559000 | 0.01316100  |
| C | -0.41383700 | 2.35865200  | 0.82871600  |
| C | -2.28715200 | 1.44494300  | -0.01417300 |
| C | -1.13176100 | 3.37106100  | 0.25557200  |
| H | 0.54562600  | 2.36315500  | 1.31447000  |
| H | -0.91953100 | 4.42067000  | 0.16820700  |
| H | -3.03081300 | 3.26066200  | -0.74605800 |
| N | -2.28795700 | 2.78165000  | -0.26047900 |
| N | -1.14525200 | 1.18179000  | 0.65841900  |
| C | 1.52442600  | -0.30947200 | -0.19905300 |
| C | 1.83659900  | 0.78852800  | -1.01772600 |
| C | 2.53235500  | -0.88614700 | 0.59369300  |
| C | 3.13440900  | 1.32421900  | -1.02974500 |
| H | 1.07295200  | 1.21195900  | -1.66655300 |
| C | 3.82832800  | -0.35367600 | 0.58202700  |
| H | 2.29156900  | -1.76617100 | 1.17998400  |
| C | 4.13230500  | 0.75726400  | -0.22339400 |
| H | 3.36852600  | 2.16477400  | -1.67532900 |
| H | 4.60416600  | -0.81057200 | 1.18770600  |
| H | 5.13886900  | 1.16255500  | -0.23581500 |
| C | -3.35090400 | 0.47606600  | -0.38907000 |
| H | -4.04895400 | 0.33974800  | 0.44500600  |
| H | -3.91005900 | 0.83885900  | -1.25523300 |
| H | -2.92046000 | -0.51895200 | -0.61252200 |

### Intermediate 1 2M-HIm MS

|   |             |             |             |
|---|-------------|-------------|-------------|
| C | -0.53046600 | 1.01085400  | -1.25579800 |
| H | 0.23481500  | 1.11266900  | -2.03106600 |
| H | -1.42315100 | 0.52729500  | -1.66697300 |
| C | 0.00375100  | 0.14364900  | -0.07094700 |
| H | -0.42819000 | 0.58002100  | 0.83124500  |
| O | -0.83505400 | 2.33367700  | -0.80843400 |
| C | -2.07571400 | 2.43569700  | 0.02385600  |
| O | -2.61501700 | 1.29159100  | 0.25689100  |
| O | -2.35199500 | 3.59549800  | 0.35871900  |
| C | -0.30652400 | -2.09572300 | -1.23556400 |
| C | -1.54875600 | -1.72065900 | 0.59825700  |
| C | -1.13917600 | -3.16789100 | -1.09022100 |
| H | 0.44014500  | -1.87915600 | -1.97855400 |
| H | -1.25463000 | -4.05530500 | -1.68502700 |
| H | -2.62133300 | -3.51011400 | 0.42903100  |
| N | -1.89722900 | -2.91598400 | 0.05585800  |
| N | -0.56971400 | -1.21605900 | -0.18184000 |
| C | 1.52065200  | 0.12594100  | 0.05989500  |
| C | 2.25030800  | -1.02024900 | 0.41573900  |
| C | 2.20082000  | 1.34699800  | -0.11489300 |
| C | 3.64402700  | -0.95573800 | 0.57189900  |
| H | 1.74647500  | -1.96838800 | 0.58130000  |
| C | 3.58975000  | 1.40975200  | 0.04559800  |
| H | 1.63627600  | 2.24311800  | -0.35732100 |
| C | 4.31828600  | 0.25807800  | 0.38507000  |
| H | 4.19693200  | -1.84904900 | 0.84365900  |
| H | 4.10126400  | 2.35679000  | -0.08821900 |

|   |             |             |            |
|---|-------------|-------------|------------|
| H | 5.39468200  | 0.30969400  | 0.50927700 |
| C | -2.16119600 | -1.09468100 | 1.79593700 |
| H | -2.93398200 | -1.74162300 | 2.21706600 |
| H | -1.40551700 | -0.89966400 | 2.56291200 |
| H | -2.59323100 | -0.12428000 | 1.48415900 |

## TS2 2M-HIm LS

|   |             |             |             |
|---|-------------|-------------|-------------|
| C | -0.22845500 | 1.14905500  | -0.71900200 |
| H | -0.04626800 | 0.67600700  | -1.67346300 |
| H | -0.75474300 | 2.09571400  | -0.72384600 |
| C | 0.47517100  | 0.66418300  | 0.57088300  |
| H | -0.25881800 | 0.60873300  | 1.37832100  |
| O | 1.43638700  | 1.64659800  | 1.02775000  |
| C | 1.99468700  | 2.44708200  | -0.04194500 |
| O | 1.37596400  | 2.20202500  | -1.17044000 |
| O | 2.91024300  | 3.22146000  | 0.23847300  |
| C | -2.00425400 | -1.16373300 | -0.92971000 |
| C | -2.93849800 | 0.54737800  | 0.11883900  |
| C | -3.28303400 | -1.55292000 | -0.60893900 |
| H | -1.21965000 | -1.71157000 | -1.42233600 |
| H | -3.80835800 | -2.47536100 | -0.77938500 |
| H | -4.79488700 | -0.42586700 | 0.41832900  |
| N | -3.85700700 | -0.46596000 | 0.05069700  |
| N | -1.81285900 | 0.13701900  | -0.47330800 |
| C | 1.10110600  | -0.70646300 | 0.37455100  |
| C | 0.70532600  | -1.78225200 | 1.18246600  |
| C | 2.07440100  | -0.91346200 | -0.62124400 |
| C | 1.26439400  | -3.05671300 | 1.00056200  |
| H | -0.03582600 | -1.62448000 | 1.96200000  |
| C | 2.63493900  | -2.18379700 | -0.80299900 |
| H | 2.39175500  | -0.08036000 | -1.24151400 |
| C | 2.23037600  | -3.26024200 | 0.00468000  |
| H | 0.95532200  | -3.88049600 | 1.63577800  |
| H | 3.39084500  | -2.33354100 | -1.56675500 |
| H | 2.67046300  | -4.24220400 | -0.13543200 |
| C | -3.17421500 | 1.88451900  | 0.74286300  |
| H | -3.31964700 | 2.65284600  | -0.02242900 |
| H | -4.05805400 | 1.86847100  | 1.38521900  |
| H | -2.31549400 | 2.17821700  | 1.35149400  |

## TS2 2M-HIm MS

|   |             |             |             |
|---|-------------|-------------|-------------|
| C | -0.55028400 | -1.74986800 | -0.67201400 |
| H | 0.00095100  | -1.46047100 | -1.57008100 |
| H | -0.23357400 | -2.75303100 | -0.36355800 |
| C | -0.25138200 | -0.76725700 | 0.47342600  |
| H | -0.07786200 | -1.15014900 | 1.46903100  |
| O | -1.93626500 | -1.76059400 | -1.05820900 |
| C | -2.84120200 | -1.57415800 | 0.07549500  |
| O | -2.17599400 | -1.22362300 | 1.13888600  |
| O | -4.04340500 | -1.74546600 | -0.13911600 |
| C | 2.42969400  | -1.70170900 | 0.84354200  |
| C | 2.46342100  | 0.02980600  | -0.53628900 |
| C | 3.74716400  | -1.49432400 | 0.51675200  |
| H | 1.99326600  | -2.44588800 | 1.48777800  |



|   |             |             |             |
|---|-------------|-------------|-------------|
| H | 4.64356600  | -2.00858300 | 0.81345700  |
| H | 4.56468600  | 0.00949700  | -0.77709800 |
| N | 3.75020900  | -0.40414900 | -0.35017700 |
| N | 1.65074300  | -0.75179100 | 0.18687800  |
| C | -0.54501500 | 0.69368500  | 0.34816900  |
| C | -0.12611400 | 1.56355700  | 1.36903400  |
| C | -1.20418600 | 1.21615600  | -0.77762200 |
| C | -0.33785300 | 2.94265400  | 1.25907000  |
| H | 0.36286600  | 1.15731400  | 2.24979900  |
| C | -1.42105900 | 2.59572800  | -0.88616100 |
| H | -1.57515900 | 0.54659100  | -1.54696200 |
| C | -0.98132600 | 3.46445800  | 0.12430100  |
| H | -0.01684500 | 3.60643500  | 2.05490900  |
| H | -1.94393600 | 2.99020300  | -1.75073500 |
| H | -1.15488000 | 4.53205300  | 0.03907700  |
| C | 2.09804600  | 1.18837700  | -1.40563200 |
| H | 2.97467600  | 1.54931400  | -1.95051700 |
| H | 1.33106600  | 0.90433500  | -2.12870900 |
| H | 1.69040900  | 2.00880100  | -0.80820300 |

### TS1 Bz-HIm LS

|   |             |             |             |
|---|-------------|-------------|-------------|
| C | -1.34808800 | -0.87738700 | -0.79735100 |
| H | -1.02861800 | -0.45944200 | -1.74344500 |
| H | -1.78854200 | -1.86625000 | -0.78248400 |
| C | -1.73298000 | 0.06518800  | 0.27950700  |
| H | -1.91853800 | -0.41796700 | 1.24335000  |
| O | -2.91056400 | 0.15192700  | -0.55790300 |
| C | -4.43574800 | -1.05266700 | 0.05276600  |
| O | -3.85824800 | -1.84151100 | 0.77297300  |
| O | -5.36424600 | -0.56828200 | -0.53080100 |
| C | 1.73544900  | -0.93096900 | -0.47901700 |
| C | 0.74185000  | -2.72773400 | 0.28707500  |
| C | 2.73373500  | -1.71578800 | 0.14547700  |
| H | -0.00669700 | -3.45994500 | 0.54290700  |
| H | 2.47952300  | -3.62170500 | 1.12378700  |
| N | 2.06838300  | -2.85113800 | 0.62266100  |
| N | 0.50528900  | -1.60502100 | -0.37353500 |
| C | -0.92548100 | 1.32854100  | 0.40198700  |
| C | 0.02928900  | 1.46504900  | 1.42293200  |
| C | -1.08057800 | 2.35545700  | -0.54346200 |
| C | 0.84429300  | 2.60403900  | 1.48417900  |
| H | 0.14047000  | 0.67842800  | 2.16486000  |
| C | -0.26682300 | 3.49632600  | -0.48306500 |
| H | -1.85368200 | 2.24842700  | -1.29760800 |
| C | 0.70283900  | 3.62008600  | 0.52591100  |
| H | 1.58353500  | 2.69976500  | 2.27276300  |
| H | -0.39481400 | 4.29053400  | -1.21168900 |
| H | 1.33034900  | 4.50432700  | 0.57364900  |
| C | 2.05250400  | 0.30882300  | -1.05703200 |
| H | 1.28807700  | 0.93281000  | -1.50445100 |
| C | 4.07402800  | -1.30651300 | 0.20997600  |
| H | 4.83884200  | -1.90720600 | 0.68872800  |
| C | 3.38279700  | 0.72140000  | -0.99561200 |
| H | 3.66149300  | 1.67856400  | -1.42100100 |
| C | 4.37891200  | -0.07543000 | -0.37419500 |

|   |            |            |             |
|---|------------|------------|-------------|
| H | 5.40138500 | 0.28516600 | -0.34786400 |
|---|------------|------------|-------------|

### TS1 Bz-HIm MS

|   |             |             |             |
|---|-------------|-------------|-------------|
| C | -1.90959900 | -0.70430600 | -1.31102500 |
| H | -1.69177700 | -0.21328500 | -2.25841000 |
| H | -1.81073700 | -1.78679700 | -1.37670600 |
| C | -1.35809800 | -0.10173000 | -0.08832200 |
| H | -1.51533300 | -0.68247000 | 0.81069700  |
| O | -3.18100200 | -0.26991700 | -0.74160200 |
| C | -3.97926700 | -1.57325100 | 0.22780700  |
| O | -3.11273800 | -2.42199300 | 0.46733600  |
| O | -5.12873800 | -1.21739800 | 0.37167300  |
| C | 1.97800600  | -0.58868500 | -0.09235500 |
| C | 0.68292100  | -2.32280000 | 0.23630200  |
| C | 2.83089800  | -1.70326700 | 0.10389100  |
| H | -0.19032100 | -2.94470000 | 0.36908900  |
| H | 2.24497400  | -3.74458400 | 0.48459200  |
| N | 1.97485400  | -2.79036100 | 0.31062800  |
| N | 0.64470600  | -1.02045600 | -0.00335800 |
| C | -0.98756500 | 1.31548300  | 0.05963900  |
| C | -0.57586600 | 1.76695400  | 1.32812200  |
| C | -0.99035100 | 2.21284300  | -1.02362200 |
| C | -0.15106700 | 3.08692800  | 1.50988600  |
| H | -0.57595800 | 1.07554500  | 2.16526900  |
| C | -0.57217100 | 3.53655200  | -0.84211000 |
| H | -1.33559500 | 1.89075900  | -1.99931800 |
| C | -0.14515600 | 3.97487500  | 0.42190100  |
| H | 0.16840400  | 3.42438700  | 2.48948600  |
| H | -0.58519400 | 4.22647100  | -1.67869000 |
| H | 0.17807700  | 5.00120000  | 0.55997900  |
| C | 2.51013300  | 0.69019500  | -0.32817700 |
| H | 1.86192900  | 1.54587400  | -0.47721300 |
| C | 3.90007700  | 0.80974600  | -0.36015000 |
| H | 4.34799500  | 1.78092400  | -0.53871200 |
| C | 4.22850500  | -1.58834900 | 0.07144400  |
| H | 4.88145300  | -2.44073100 | 0.22029800  |
| C | 4.74591800  | -0.31256900 | -0.16375900 |
| H | 5.82107200  | -0.17412600 | -0.19735100 |

### Intermediate 1 Bz-HIm LS

|   |             |             |             |
|---|-------------|-------------|-------------|
| C | -0.25858700 | -0.59086300 | -0.98013600 |
| H | -0.21103600 | 0.32440200  | -1.57164000 |
| H | -0.49115400 | -1.42613100 | -1.64150700 |
| C | -1.37163100 | -0.50426000 | 0.11973800  |
| H | -0.91022200 | -0.76980200 | 1.08132300  |
| O | -2.42820100 | -1.41676300 | -0.18438100 |
| C | -2.14746600 | -2.85991100 | 0.00797800  |
| O | -0.93469900 | -3.10488300 | 0.36827500  |
| O | -3.11605600 | -3.59168100 | -0.22469400 |
| C | 2.16246700  | 0.08764100  | -0.38528000 |
| C | 1.42889100  | -1.93516000 | 0.24673100  |
| C | 3.21069200  | -0.55804700 | 0.30081100  |
| H | 0.67075000  | -2.73033100 | 0.39531700  |
| H | 3.19336500  | -2.52711700 | 1.19468500  |
| N | 2.70536900  | -1.81516900 | 0.67452600  |

|   |             |             |             |
|---|-------------|-------------|-------------|
| N | 1.08116000  | -0.81237100 | -0.40216300 |
| C | -1.93976200 | 0.90305100  | 0.20324500  |
| C | -1.12271200 | 1.94639800  | 0.67680300  |
| C | -3.25152500 | 1.18369200  | -0.20484000 |
| C | -1.60651700 | 3.26049400  | 0.73172600  |
| H | -0.11273000 | 1.73248100  | 1.02334200  |
| C | -3.73579000 | 2.50024500  | -0.15037600 |
| H | -3.87291600 | 0.36371300  | -0.54391900 |
| C | -2.91733000 | 3.54131500  | 0.31293000  |
| H | -0.97269300 | 4.05712100  | 1.10843100  |
| H | -4.75295700 | 2.71064400  | -0.46442600 |
| H | -3.29777500 | 4.55663200  | 0.35730800  |
| C | 2.30639200  | 1.38635800  | -0.88957600 |
| H | 1.49890200  | 1.89463300  | -1.40265400 |
| C | 4.45078500  | 0.05908800  | 0.50287100  |
| H | 5.25918000  | -0.43461200 | 1.02865200  |
| C | 3.54212800  | 2.00541100  | -0.68851500 |
| H | 3.69746500  | 3.01119000  | -1.06074400 |
| C | 4.59789000  | 1.35218800  | -0.00596000 |
| H | 5.54022100  | 1.87072900  | 0.12678100  |

### Intermediate 1 Bz-HIm MS

|   |             |             |             |
|---|-------------|-------------|-------------|
| C | -1.62024100 | 1.60200400  | 0.25378100  |
| H | -1.47751400 | 2.62436400  | 0.61971300  |
| H | -1.78345200 | 1.63931000  | -0.83061100 |
| C | -0.32101200 | 0.84019900  | 0.59168100  |
| H | -0.30095600 | 0.71513900  | 1.68034000  |
| O | -2.74272200 | 1.03346700  | 0.94041600  |
| C | -3.89152800 | 0.51242000  | 0.14216700  |
| O | -3.56547900 | 0.18951000  | -1.06731000 |
| O | -4.94566100 | 0.43345100  | 0.77820100  |
| C | 0.71469500  | -1.47230400 | 0.26652300  |
| C | -1.23650100 | -1.07940500 | -0.77548200 |
| C | 0.34964000  | -2.64627600 | -0.41745300 |
| H | -2.20901900 | -0.56773300 | -1.08108700 |
| H | -1.42664600 | -2.97852000 | -1.60782900 |
| N | -0.86774200 | -2.35027600 | -1.05195200 |
| N | -0.30057600 | -0.52665900 | 0.01627600  |
| C | 0.89797200  | 1.62780300  | 0.13513300  |
| C | 1.58731700  | 2.43071000  | 1.05732900  |
| C | 1.30786700  | 1.61168000  | -1.20811300 |
| C | 2.67811700  | 3.20873800  | 0.64395300  |
| H | 1.26879000  | 2.45361000  | 2.09628100  |
| C | 2.40002700  | 2.38490300  | -1.62250900 |
| H | 0.77798900  | 0.99755200  | -1.93118500 |
| C | 3.08846900  | 3.18520900  | -0.69739900 |
| H | 3.20354100  | 3.82855400  | 1.36241500  |
| H | 2.71087000  | 2.36764700  | -2.66156700 |
| H | 3.93279900  | 3.78528900  | -1.01897300 |
| C | 1.89251500  | -1.39863300 | 1.01951300  |
| H | 2.18467300  | -0.49069100 | 1.53202200  |
| C | 2.68393300  | -2.54918300 | 1.06349300  |
| H | 3.60519400  | -2.53751700 | 1.63417500  |
| C | 1.13940200  | -3.80053100 | -0.37805300 |
| H | 0.85855000  | -4.70635800 | -0.90174400 |

|   |            |             |            |
|---|------------|-------------|------------|
| C | 2.31379700 | -3.73110000 | 0.37687300 |
| H | 2.95749900 | -4.60093500 | 0.43869900 |

### TS2 Bz-HIm LS

|   |             |             |             |
|---|-------------|-------------|-------------|
| C | -1.00202400 | -1.38769800 | -0.57105100 |
| H | -0.74409800 | -0.88205100 | -1.49068000 |
| H | -1.13711700 | -2.46209500 | -0.61775300 |
| C | -1.50506200 | -0.60923700 | 0.66920900  |
| H | -1.00717200 | -1.00181600 | 1.55866900  |
| O | -2.90955000 | -0.86932800 | 0.90241500  |
| C | -3.65453400 | -1.16712400 | -0.30568700 |
| O | -2.84486200 | -1.29388800 | -1.32593200 |
| O | -4.87795400 | -1.27337300 | -0.20952600 |
| C | 1.84270100  | -0.61549800 | -0.33120000 |
| C | 1.34202000  | -2.56746500 | 0.55329900  |
| C | 3.04791100  | -1.17620700 | 0.15050800  |
| H | 0.79597900  | -3.43461900 | 0.88714200  |
| H | 3.31408100  | -3.07619500 | 1.13820300  |
| N | 2.69190900  | -2.41190500 | 0.70640600  |
| N | 0.80229500  | -1.52179700 | -0.05689100 |
| C | -1.20480700 | 0.87412900  | 0.54383200  |
| C | -0.37971300 | 1.50493900  | 1.48538200  |
| C | -1.72592400 | 1.62229500  | -0.52879000 |
| C | -0.05648700 | 2.86417500  | 1.35582100  |
| H | 0.01304400  | 0.93495400  | 2.32337800  |
| C | -1.40573300 | 2.97951400  | -0.65936900 |
| H | -2.37664700 | 1.13959300  | -1.25189500 |
| C | -0.56522000 | 3.60377400  | 0.27881900  |
| H | 0.58312700  | 3.34172700  | 2.09063200  |
| H | -1.81652100 | 3.55156200  | -1.48473600 |
| H | -0.32208700 | 4.65642100  | 0.17701300  |
| C | 1.83014700  | 0.64429400  | -0.95279500 |
| H | 0.90910100  | 1.09541800  | -1.30195700 |
| C | 4.27953800  | -0.51546100 | 0.03276100  |
| C | 3.05218600  | 1.30337900  | -1.07463400 |
| H | 3.08133600  | 2.28057500  | -1.54218900 |
| C | 4.25817800  | 0.73308900  | -0.59056600 |
| H | 5.18466200  | 1.28443700  | -0.70539500 |
| H | 5.20276200  | -0.94468000 | 0.40406700  |

### TS2 Bz-HIm MS

|   |             |             |             |
|---|-------------|-------------|-------------|
| C | -0.53753700 | -1.58715800 | -0.83294800 |
| H | -0.17870400 | -1.10562500 | -1.74480600 |
| H | 0.15757500  | -2.38679800 | -0.55196300 |
| C | -0.62034100 | -0.57519000 | 0.32302300  |
| H | -0.21125300 | -0.83820500 | 1.28802600  |
| O | -1.82402800 | -2.13784200 | -1.16563100 |
| C | -2.64209300 | -2.38427100 | 0.01977900  |
| O | -2.08806000 | -1.85325600 | 1.07425100  |
| O | -3.69150900 | -3.01008200 | -0.14461600 |
| C | 2.29677900  | -0.12083400 | 0.08418000  |
| C | 1.10487000  | 1.58988500  | -0.61709300 |
| C | 3.20960400  | 0.87663800  | -0.32934700 |
| H | 0.27045800  | 2.22542800  | -0.86719700 |
| H | 2.74626100  | 2.82745200  | -1.12744400 |

|   |             |             |             |
|---|-------------|-------------|-------------|
| N | 2.41779600  | 1.94530300  | -0.76878600 |
| N | 0.99510400  | 0.36752500  | -0.11651900 |
| C | -1.55635100 | 0.58774200  | 0.27160100  |
| C | -1.71747700 | 1.38862400  | 1.41549100  |
| C | -2.24311400 | 0.92218200  | -0.90907000 |
| C | -2.54895700 | 2.51322900  | 1.38311800  |
| H | -1.20881300 | 1.11341200  | 2.33420300  |
| C | -3.07779400 | 2.04864000  | -0.94085200 |
| H | -2.16616100 | 0.28434000  | -1.78288600 |
| C | -3.22893600 | 2.84992200  | 0.20048700  |
| H | -2.67947800 | 3.11630600  | 2.27526400  |
| H | -3.62174000 | 2.28799500  | -1.84826700 |
| H | -3.88284500 | 3.71529700  | 0.17617700  |
| C | 2.74988600  | -1.34503800 | 0.60135800  |
| H | 2.05854200  | -2.11244700 | 0.92847600  |
| C | 4.59760300  | 0.69471100  | -0.25206400 |
| C | 5.03937600  | -0.52676900 | 0.26015100  |
| H | 6.10405500  | -0.71489600 | 0.33962300  |
| C | 4.12992200  | -1.53037100 | 0.68228200  |
| H | 4.51970300  | -2.46188400 | 1.07596000  |
| H | 5.29823700  | 1.45761400  | -0.57063200 |

# TS1 2I-1M-Im LS

|   |             |             |             |
|---|-------------|-------------|-------------|
| C | -0.89551000 | 0.82050400  | 1.28322900  |
| H | -1.43502100 | 0.40921400  | 2.12768200  |
| H | -0.18898600 | 1.62364300  | 1.45469800  |
| C | -1.55067100 | 0.74518500  | -0.04646600 |
| H | -0.91780500 | 1.09671900  | -0.86760400 |
| O | -2.34690000 | 1.79511000  | 0.54230200  |
| C | -1.78946000 | 3.66727300  | -0.02910600 |
| O | -0.71116600 | 3.46332200  | -0.54655800 |
| O | -2.71969100 | 4.31444800  | 0.36451900  |
| C | 0.16248000  | -1.93945000 | 1.76067200  |
| C | 1.55894000  | -0.75343800 | 0.56207700  |
| C | 1.08733200  | -2.81883700 | 1.24243000  |
| H | -0.69913400 | -2.13701000 | 2.37368900  |
| H | 1.18134200  | -3.88640500 | 1.33722700  |
| N | 1.97244200  | -2.06118700 | 0.47978200  |
| N | 0.47599800  | -0.65617200 | 1.33408400  |
| C | -2.27230200 | -0.53354600 | -0.37567100 |
| C | -1.66231200 | -1.49546800 | -1.19885300 |
| C | -3.53580700 | -0.79569300 | 0.17692500  |
| C | -2.29953100 | -2.71801900 | -1.45380200 |
| H | -0.69378800 | -1.28300300 | -1.64680700 |
| C | -4.17584000 | -2.01736800 | -0.07922000 |
| H | -4.00269600 | -0.02396500 | 0.78039300  |
| C | -3.55789600 | -2.98350500 | -0.88984300 |
| H | -1.82566600 | -3.45483600 | -2.09502900 |
| H | -5.15657600 | -2.21248200 | 0.34277200  |
| H | -4.05681900 | -3.92624100 | -1.09079600 |
| I | 2.48116900  | 0.84416400  | -0.39675800 |
| C | 3.12122900  | -2.57342200 | -0.26879800 |
| H | 3.00819200  | -2.36030900 | -1.33429900 |
| H | 4.04649200  | -2.11970300 | 0.09364300  |
| H | 3.17756800  | -3.65311300 | -0.12799200 |

### TS1 2I-1M-Im MS

|   |             |             |             |
|---|-------------|-------------|-------------|
| C | 1.00914500  | 1.18979700  | -1.39628500 |
| H | 1.35836300  | 0.73287600  | -2.32263400 |
| H | 0.00318000  | 1.60175800  | -1.48846400 |
| C | 1.24609000  | 0.45073900  | -0.14302600 |
| H | 0.72028100  | 0.85279300  | 0.71685600  |
| O | 1.96691100  | 2.13784300  | -0.84701800 |
| C | 1.22598700  | 3.54984000  | -0.03195600 |
| O | 0.03185600  | 3.28787100  | 0.13660300  |
| O | 2.13051600  | 4.34456800  | 0.12948100  |
| C | 0.08444000  | -2.47291300 | -0.52893900 |
| C | -1.54459200 | -1.06801100 | -0.12427500 |
| C | -1.08941700 | -3.19137600 | -0.61112500 |
| H | 1.10225300  | -2.80117300 | -0.65592800 |
| H | -1.27271200 | -4.23051300 | -0.82275400 |
| N | -2.12328700 | -2.29453000 | -0.35221300 |
| N | -0.21776100 | -1.15278500 | -0.22519700 |
| C | 2.42117800  | -0.40766000 | 0.10260300  |
| C | 2.58866300  | -0.96832900 | 1.38288200  |
| C | 3.35988400  | -0.69609100 | -0.90467100 |
| C | 3.66720800  | -1.81781000 | 1.65161300  |
| H | 1.86675600  | -0.74133500 | 2.16170200  |
| C | 4.44354000  | -1.54070500 | -0.63518700 |
| H | 3.26862500  | -0.23357900 | -1.88061000 |
| C | 4.59723600  | -2.10759000 | 0.64007500  |
| H | 3.78923600  | -2.24439000 | 2.64114200  |
| H | 5.17355000  | -1.74621400 | -1.41047300 |
| H | 5.44033400  | -2.75820400 | 0.84737300  |
| I | -2.58674000 | 0.67470800  | 0.32866000  |
| C | -3.55243100 | -2.60880700 | -0.32667900 |
| H | -3.97188300 | -2.40243900 | 0.66069700  |
| H | -4.08662300 | -2.01888500 | -1.07499100 |
| H | -3.68265600 | -3.66779800 | -0.55173800 |

### Intermediate 1 2I-1M-Im LS

|   |             |             |             |
|---|-------------|-------------|-------------|
| C | -0.48623300 | 0.55104800  | 1.18856300  |
| H | -1.15188600 | 0.50099500  | 2.05276900  |
| H | 0.28003100  | 1.31517300  | 1.34056600  |
| C | -1.29701400 | 0.96294300  | -0.07610700 |
| H | -0.60138800 | 0.98103500  | -0.92663400 |
| O | -1.81489300 | 2.26365300  | 0.18472800  |
| C | -0.78820200 | 3.40347200  | 0.06834700  |
| O | 0.38824200  | 2.97548100  | -0.16527400 |
| O | -1.31252400 | 4.51123900  | 0.24400400  |
| C | -0.42676100 | -1.97889200 | 1.38014400  |
| C | 1.33719700  | -1.00947700 | 0.41102500  |
| C | 0.42476800  | -2.97463300 | 0.98268100  |
| H | -1.39357600 | -2.02404600 | 1.84877600  |
| H | 0.33852500  | -4.04281400 | 1.06741000  |
| N | 1.51963200  | -2.35909200 | 0.37793000  |
| N | 0.15736800  | -0.76897000 | 1.02901900  |
| C | -2.42879000 | -0.01121400 | -0.32580100 |
| C | -2.25056000 | -1.10634800 | -1.18724100 |
| C | -3.65247000 | 0.14122700  | 0.34942600  |

|   |             |             |             |
|---|-------------|-------------|-------------|
| C | -3.27090200 | -2.05554400 | -1.35736200 |
| H | -1.32142400 | -1.20608500 | -1.74480600 |
| C | -4.67220600 | -0.80578200 | 0.18248500  |
| H | -3.79607600 | 1.02153900  | 0.96670700  |
| C | -4.48264900 | -1.91094600 | -0.66525700 |
| H | -3.12852400 | -2.89088200 | -2.03585000 |
| H | -5.61857800 | -0.67589200 | 0.69750300  |
| H | -5.27768100 | -2.63727400 | -0.79997400 |
| I | 2.61962800  | 0.42147400  | -0.33869700 |
| C | 2.67870100  | -3.05325700 | -0.19461800 |
| H | 2.77807100  | -2.80939800 | -1.25410500 |
| H | 3.59031700  | -2.76548000 | 0.33269300  |
| H | 2.52702000  | -4.12713300 | -0.08813500 |

### Intermediate 1 2I-1M-Im MS

|   |             |             |             |
|---|-------------|-------------|-------------|
| C | 0.27505500  | -2.06376100 | -1.02964600 |
| H | -0.27279600 | -2.91138500 | -1.45172900 |
| H | 0.24556000  | -1.21252600 | -1.71870200 |
| C | -0.37133600 | -1.69647100 | 0.33149900  |
| H | -0.29509800 | -2.58897000 | 0.96207900  |
| O | 1.62099200  | -2.49906200 | -0.81051700 |
| C | 2.71191200  | -1.47543600 | -0.96754900 |
| O | 2.28898700  | -0.30285000 | -1.25987900 |
| O | 3.84017900  | -1.94736300 | -0.74426800 |
| C | 1.53600100  | -1.11249500 | 1.86241600  |
| C | 0.75412600  | 0.57594400  | 0.63326800  |
| C | 2.38152800  | -0.05484800 | 2.02554200  |
| H | 1.60590900  | -2.12268200 | 2.22121100  |
| H | 3.30893700  | 0.01991500  | 2.56245500  |
| N | 1.87326000  | 0.99671800  | 1.26639600  |
| N | 0.51403000  | -0.70504400 | 1.00619200  |
| C | -1.82602100 | -1.24748400 | 0.30961100  |
| C | -2.61150600 | -1.34233700 | -0.84961200 |
| C | -2.41042700 | -0.75934600 | 1.49315100  |
| C | -3.95653700 | -0.94430700 | -0.82894200 |
| H | -2.18395200 | -1.70906700 | -1.77580800 |
| C | -3.75080100 | -0.35793600 | 1.51483600  |
| H | -1.81268000 | -0.68605900 | 2.39794800  |
| C | -4.52953300 | -0.44792500 | 0.34992900  |
| H | -4.55218300 | -1.01901400 | -1.73245200 |
| H | -4.18758300 | 0.02147300  | 2.43249700  |
| H | -5.56909000 | -0.13843500 | 0.36351300  |
| C | 2.63160600  | 2.20529200  | 0.92519000  |
| H | 3.46201500  | 2.30193900  | 1.62447300  |
| H | 3.01486900  | 2.08136800  | -0.09124700 |
| H | 1.99971400  | 3.09219400  | 0.99567500  |
| I | -0.34868500 | 1.75755500  | -0.65658200 |

### TS2 2I-1M-Im LS

|   |             |            |             |
|---|-------------|------------|-------------|
| C | -0.67225700 | 0.80252000 | 0.99530000  |
| H | -1.15017700 | 0.37681900 | 1.86658900  |
| H | 0.11995200  | 1.52258000 | 1.16655200  |
| C | -1.31731300 | 0.69801400 | -0.40828000 |
| H | -0.53539400 | 0.46972700 | -1.13779600 |

|   |             |             |             |
|---|-------------|-------------|-------------|
| O | -1.84210000 | 1.97483000  | -0.83787200 |
| C | -2.25660900 | 2.83781500  | 0.25336100  |
| O | -1.91281700 | 2.32352700  | 1.40485400  |
| O | -2.82861800 | 3.88864400  | -0.04146500 |
| C | 0.09114100  | -1.94606000 | 1.20995300  |
| C | 1.71876800  | -0.72568600 | 0.37139000  |
| C | 1.15296500  | -2.79120200 | 0.98342900  |
| H | -0.89394000 | -2.15716700 | 1.58838600  |
| H | 1.25966800  | -3.84958400 | 1.14357800  |
| N | 2.17994000  | -2.01372400 | 0.45221800  |
| N | 0.46397000  | -0.66679700 | 0.82543900  |
| C | -2.36937000 | -0.39850700 | -0.44383200 |
| C | -2.23427600 | -1.47456600 | -1.33282100 |
| C | -3.47907400 | -0.35341600 | 0.42121900  |
| C | -3.18718900 | -2.50485200 | -1.35850100 |
| H | -1.38826200 | -1.50424700 | -2.01499900 |
| C | -4.43193400 | -1.37948500 | 0.39608700  |
| H | -3.59346700 | 0.48650200  | 1.10050300  |
| C | -4.28780600 | -2.46030900 | -0.49066700 |
| H | -3.07677300 | -3.32931200 | -2.05551600 |
| H | -5.28938500 | -1.33334600 | 1.05931600  |
| H | -5.03083200 | -3.25095200 | -0.51124400 |
| C | 3.50677700  | -2.49557900 | 0.05840500  |
| H | 4.28250900  | -1.99275000 | 0.63994900  |
| H | 3.55928400  | -3.56742200 | 0.24968800  |
| H | 3.67644000  | -2.31612300 | -1.00550300 |
| I | 2.80789300  | 0.88416600  | -0.36165100 |

## TS2 2I-1M-Im MS

|   |             |             |             |
|---|-------------|-------------|-------------|
| C | -0.87519500 | -1.19201900 | -1.27381600 |
| H | -0.75158700 | -0.50720100 | -2.11633800 |
| H | -0.01311400 | -1.86822400 | -1.22788100 |
| C | -0.95179700 | -0.40904900 | 0.04839800  |
| H | -0.39406700 | -0.76634600 | 0.90297700  |
| O | -2.07701000 | -1.92996500 | -1.55375400 |
| C | -2.66232000 | -2.53010700 | -0.35196500 |
| O | -2.07775700 | -2.07713100 | 0.71826100  |
| O | -3.59111900 | -3.32312600 | -0.52776100 |
| C | 0.20033100  | 2.10619400  | -0.94350000 |
| C | 1.73612500  | 0.69217000  | -0.25126200 |
| C | 1.42146900  | 2.70764900  | -1.14261800 |
| H | -0.79330500 | 2.47315300  | -1.13482500 |
| H | 1.67523700  | 3.67238000  | -1.54580700 |
| N | 2.39041500  | 1.80945000  | -0.70197400 |
| N | 0.41707000  | 0.85308200  | -0.38972500 |
| C | -2.06317900 | 0.54920700  | 0.31845300  |
| C | -2.14169300 | 1.16880400  | 1.57743900  |
| C | -3.01390500 | 0.86407300  | -0.66874500 |
| C | -3.15234900 | 2.09634100  | 1.84980100  |
| H | -1.42080000 | 0.90688300  | 2.34619700  |
| C | -4.02820600 | 1.79186500  | -0.39476000 |
| H | -2.99342800 | 0.35335500  | -1.62564100 |
| C | -4.09795100 | 2.41374700  | 0.86046400  |
| H | -3.21354200 | 2.56076500  | 2.82820200  |
| H | -4.77117800 | 2.01473400  | -1.15290400 |



|   |             |             |             |
|---|-------------|-------------|-------------|
| H | -4.88838200 | 3.12604100  | 1.07277300  |
| C | 3.83896700  | 2.03082200  | -0.72308700 |
| H | 4.03315900  | 3.01880500  | -1.14076200 |
| H | 4.24725600  | 1.98612100  | 0.28886600  |
| H | 4.32948400  | 1.27976600  | -1.34610600 |
| I | 2.67938000  | -0.98083700 | 0.54661100  |

### **ZnI<sub>2</sub>SO<sub>2</sub> complex**

|    |             |             |             |
|----|-------------|-------------|-------------|
| Zn | -1.59824100 | 0.00015700  | -0.00011400 |
| I  | -2.53512000 | 2.43044800  | -0.02044100 |
| I  | -2.53789800 | -2.42909200 | 0.02053500  |
| O  | -0.10768000 | 0.08345800  | 1.45208300  |
| O  | -0.10799500 | -0.08483300 | -1.45230600 |
| C  | 0.03393700  | 1.04579600  | 2.59072000  |
| H  | 0.26424900  | 0.55170400  | 3.52751500  |
| H  | -0.72541900 | 1.82099400  | 2.60294500  |
| C  | 1.05496800  | 1.03849200  | 1.50487400  |
| H  | 0.98262000  | 1.82250900  | 0.75485700  |
| C  | 0.03384000  | -1.04762900 | -2.59048400 |
| H  | 0.26417800  | -0.55390200 | -3.52746600 |
| H  | -0.72543600 | -1.82290600 | -2.60246200 |
| C  | 1.05478700  | -1.03968800 | -1.50454700 |
| H  | 0.98250900  | -1.82338500 | -0.75419200 |
| C  | 2.38915800  | -0.40178900 | -1.67925900 |
| C  | 3.54394000  | -1.14262300 | -1.38319400 |
| C  | 2.50453500  | 0.91230400  | -2.16434300 |
| C  | 4.80996500  | -0.58114300 | -1.59189400 |
| H  | 3.45727900  | -2.14839300 | -0.98283100 |
| C  | 3.77204500  | 1.47506700  | -2.36181000 |
| H  | 1.60662500  | 1.48829800  | -2.36696600 |
| C  | 4.92723300  | 0.72735500  | -2.08344900 |
| H  | 5.69870700  | -1.15725800 | -1.35884400 |
| H  | 3.85907100  | 2.48991800  | -2.73515800 |
| H  | 5.90804500  | 1.16277000  | -2.24243000 |
| C  | 2.38940200  | 0.40068800  | 1.67939800  |
| C  | 3.54408800  | 1.14157800  | 1.38310900  |
| C  | 2.50493700  | -0.91338900 | 2.16449700  |
| C  | 4.81018100  | 0.58015600  | 1.59155900  |
| H  | 3.45728200  | 2.14733500  | 0.98274300  |
| C  | 3.77250800  | -1.47609100 | 2.36172400  |
| H  | 1.60709400  | -1.48942800 | 2.36729100  |
| C  | 4.92760500  | -0.72833400 | 2.08309900  |
| H  | 5.69885200  | 1.15629900  | 1.35831200  |
| H  | 3.85966100  | -2.49093200 | 2.73507100  |
| H  | 5.90846800  | -1.16370600 | 2.24188400  |

### **TS ZnI<sub>2</sub> + SO + CO<sub>2</sub>**

|    |             |             |             |
|----|-------------|-------------|-------------|
| Zn | -1.39337600 | 0.02345000  | -0.36190700 |
| I  | -2.84045800 | -1.66947200 | 1.06783600  |
| I  | -2.13619900 | 2.26985600  | -1.51311300 |
| O  | -0.29398100 | -1.24889000 | -1.56703400 |
| O  | 0.18535500  | 0.51394000  | 0.75685000  |
| C  | -0.47624200 | -2.66092900 | -2.01763800 |
| H  | -0.14052600 | -2.81971000 | -3.03611400 |
| H  | -1.42937000 | -3.09377100 | -1.73156000 |

|   |             |             |             |
|---|-------------|-------------|-------------|
| C | 0.52676400  | -2.35707200 | -0.95761800 |
| H | 0.22900700  | -2.57948100 | 0.06404500  |
| C | 0.01900500  | 2.15406900  | 2.20069300  |
| H | 0.54675800  | 2.52140100  | 3.07841500  |
| H | -1.06736900 | 2.08728800  | 2.23615300  |
| C | 0.66966000  | 1.84712200  | 0.91487000  |
| H | 0.21959900  | 2.52395800  | 0.14919900  |
| C | 2.17946700  | 1.98060900  | 0.87917300  |
| C | 2.76870400  | 3.23697700  | 1.09916700  |
| C | 2.98385300  | 0.86329000  | 0.61839100  |
| C | 4.16324000  | 3.37171500  | 1.07688300  |
| H | 2.14670500  | 4.11402200  | 1.26808300  |
| C | 4.37951100  | 1.00138800  | 0.58967200  |
| H | 2.51696400  | -0.09593800 | 0.42772000  |
| C | 4.97137000  | 2.25133700  | 0.82223400  |
| H | 4.61655900  | 4.34282500  | 1.24418700  |
| H | 4.99435400  | 0.13284300  | 0.37979500  |
| H | 6.05084500  | 2.35666200  | 0.79762700  |
| C | 1.99064600  | -2.26676000 | -1.20488600 |
| C | 2.87150700  | -2.89539100 | -0.30882700 |
| C | 2.50190000  | -1.55121300 | -2.30145500 |
| C | 4.25595300  | -2.82821000 | -0.52017600 |
| H | 2.47901700  | -3.42881800 | 0.55113100  |
| C | 3.88514000  | -1.47808000 | -2.50575300 |
| H | 1.82024100  | -1.02647600 | -2.96306600 |
| C | 4.76510500  | -2.12130700 | -1.62020200 |
| H | 4.93126900  | -3.32114900 | 0.17098700  |
| H | 4.27651100  | -0.91614300 | -3.34665600 |
| H | 5.83630000  | -2.06639400 | -1.78357600 |
| C | 0.60500100  | -0.74093500 | 2.79781400  |
| O | 0.35184700  | 0.26614100  | 3.39967300  |
| O | 0.90349000  | -1.79302300 | 2.35756900  |

### **ZnI<sub>2</sub>(SC)(SO) complex**

|    |             |             |             |
|----|-------------|-------------|-------------|
| Zn | 1.95088100  | -0.19214800 | -0.19912100 |
| I  | 0.98253300  | -2.45082100 | 0.78808400  |
| I  | 4.33139100  | 0.79428900  | -0.27280800 |
| O  | 0.81777900  | 1.23826700  | 0.82825800  |
| O  | -1.29063300 | 0.17670900  | -1.01892100 |
| C  | 0.86972000  | 1.56730300  | 2.28492000  |
| H  | 0.98865000  | 2.62764900  | 2.47525700  |
| H  | 1.48643600  | 0.89124900  | 2.86738100  |
| C  | -0.40228100 | 1.06849000  | 1.68488600  |
| H  | -0.64640100 | 0.02133800  | 1.84551100  |
| C  | -2.51717200 | 0.05400100  | -3.01986300 |
| H  | -2.80623100 | -0.96674000 | -3.27125000 |
| H  | -3.01479500 | 0.77464500  | -3.66364500 |
| C  | -2.67721300 | 0.35963700  | -1.50322500 |
| H  | -2.93020000 | 1.40830700  | -1.32327000 |
| C  | -3.61220000 | -0.56244100 | -0.76603500 |
| C  | -4.96994200 | -0.21701300 | -0.67236100 |
| C  | -3.14792300 | -1.75692200 | -0.19319300 |
| C  | -5.86813100 | -1.07192800 | -0.02010200 |
| H  | -5.32403600 | 0.72112300  | -1.09170200 |
| C  | -4.04756200 | -2.60432100 | 0.46930900  |

|   |             |             |             |
|---|-------------|-------------|-------------|
| H | -2.09369300 | -2.01463400 | -0.23338400 |
| C | -5.40723600 | -2.26770700 | 0.55341600  |
| H | -6.91688300 | -0.80394300 | 0.04849600  |
| H | -3.68254600 | -3.52051000 | 0.91984600  |
| H | -6.09981300 | -2.92698900 | 1.06537800  |
| C | -1.54307300 | 1.96332200  | 1.34661200  |
| C | -2.83874800 | 1.59661400  | 1.74217700  |
| C | -1.34493700 | 3.15166500  | 0.62088000  |
| C | -3.93131200 | 2.41796700  | 1.42803700  |
| H | -3.00072800 | 0.66597100  | 2.27760000  |
| C | -2.43803100 | 3.96646300  | 0.29864600  |
| H | -0.34528800 | 3.41482800  | 0.28965900  |
| C | -3.73457800 | 3.60342000  | 0.70426500  |
| H | -4.92844700 | 2.12550200  | 1.73868400  |
| H | -2.28133100 | 4.88155700  | -0.26242300 |
| H | -4.57861900 | 4.24046700  | 0.46202800  |
| C | -0.41791100 | 0.14691400  | -2.05717200 |
| O | -1.05961000 | 0.17940600  | -3.24999200 |
| O | 0.80505400  | 0.09662000  | -1.92026500 |

### TS3

|    |             |             |             |
|----|-------------|-------------|-------------|
| Zn | 1.83056000  | 0.14804000  | -0.05570300 |
| I  | 3.94222100  | -0.92681000 | -1.15093300 |
| I  | 1.50686300  | 2.33717900  | 1.44445400  |
| O  | 1.04705900  | -1.38998900 | 1.13675000  |
| O  | 0.20160600  | 0.08739500  | -1.23547800 |
| C  | 1.51015400  | -2.79683900 | 1.33909300  |
| H  | 1.45216300  | -3.10970900 | 2.37532600  |
| H  | 2.41486200  | -3.03787400 | 0.79000600  |
| C  | 0.24276500  | -2.53270900 | 0.59642000  |
| H  | 0.27998000  | -2.59122000 | -0.48849800 |
| C  | -0.77659100 | 1.56586100  | -1.53029100 |
| H  | -0.99969700 | 1.50639200  | -2.58714200 |
| H  | -0.12478200 | 2.34344400  | -1.15539100 |
| C  | -1.11299700 | 0.41652900  | -0.67074000 |
| H  | -1.09491800 | 0.61735400  | 0.40327700  |
| C  | -2.22961100 | -0.49136600 | -1.08991500 |
| C  | -3.44045600 | -0.47790000 | -0.38054200 |
| C  | -2.08513500 | -1.32741100 | -2.20857400 |
| C  | -4.50807500 | -1.28453900 | -0.79431500 |
| H  | -3.54340100 | 0.15098800  | 0.49916100  |
| C  | -3.15129800 | -2.14080400 | -2.61812000 |
| H  | -1.13516200 | -1.33718000 | -2.73409800 |
| C  | -4.36650200 | -2.11753400 | -1.91524500 |
| H  | -5.43880900 | -1.27598600 | -0.23681300 |
| H  | -3.03610800 | -2.78860600 | -3.48116900 |
| H  | -5.19143600 | -2.74687900 | -2.23335700 |
| C  | -1.09863800 | -2.71059600 | 1.22116200  |
| C  | -2.01178200 | -3.60421200 | 0.63941300  |
| C  | -1.45245300 | -2.00299800 | 2.38181900  |
| C  | -3.26729200 | -3.80507800 | 1.22575000  |
| H  | -1.75072800 | -4.12958700 | -0.27446300 |
| C  | -2.71344900 | -2.19918400 | 2.96128100  |
| H  | -0.74862700 | -1.29515400 | 2.80836300  |
| C  | -3.62091100 | -3.10379800 | 2.38868600  |

|   |             |             |             |
|---|-------------|-------------|-------------|
| H | -3.97024100 | -4.49312100 | 0.76881600  |
| H | -2.98544000 | -1.64995100 | 3.85662000  |
| H | -4.59524000 | -3.25711700 | 2.84088000  |
| C | -3.74316500 | 2.93677200  | -1.53502200 |
| C | -2.28406600 | 3.79914800  | -0.14480200 |
| C | -4.43754600 | 3.83015300  | -0.74496400 |
| H | -4.10805700 | 2.30280600  | -2.32416600 |
| N | -3.49909700 | 4.36811500  | 0.13108200  |
| H | -1.37306100 | 4.01238000  | 0.39178300  |
| H | -5.47538400 | 4.11240600  | -0.73353000 |
| H | -3.67686200 | 5.05623900  | 0.84505700  |
| N | -2.40438200 | 2.93465700  | -1.15292700 |

## Intermediate 2

|    |             |             |             |
|----|-------------|-------------|-------------|
| Zn | 1.75001800  | 0.00292900  | -0.17723400 |
| I  | 3.99277000  | -1.11147600 | -0.94536000 |
| I  | 1.55352300  | 2.36434600  | 1.22792200  |
| O  | 0.96338200  | -1.37010400 | 1.24052900  |
| O  | 0.18310600  | -0.15366300 | -1.29493400 |
| C  | 1.32274600  | -2.79690100 | 1.49510100  |
| H  | 1.23187300  | -3.07331500 | 2.53963400  |
| H  | 2.21532500  | -3.12047400 | 0.96890700  |
| C  | 0.08766900  | -2.46819000 | 0.72288400  |
| H  | 0.13168200  | -2.54981600 | -0.35960300 |
| C  | -1.07380600 | 1.83048600  | -1.63725500 |
| H  | -1.30172300 | 1.68566700  | -2.69504700 |
| H  | -0.09594300 | 2.30440800  | -1.53339700 |
| C  | -1.01829400 | 0.45461300  | -0.90112000 |
| H  | -1.05695900 | 0.67792000  | 0.18545700  |
| C  | -2.24197400 | -0.38254600 | -1.24990100 |
| C  | -3.43036300 | -0.27741200 | -0.50929900 |
| C  | -2.18930600 | -1.25803800 | -2.34721200 |
| C  | -4.56532400 | -1.01680600 | -0.87364300 |
| H  | -3.45803600 | 0.34839800  | 0.38036300  |
| C  | -3.32079400 | -2.00148900 | -2.71150200 |
| H  | -1.24727100 | -1.35284100 | -2.87781400 |
| C  | -4.51500100 | -1.87727600 | -1.98048200 |
| H  | -5.47159500 | -0.94375700 | -0.28087200 |
| H  | -3.27290400 | -2.67946000 | -3.55801100 |
| H  | -5.38885900 | -2.45684500 | -2.26094600 |
| C  | -1.27562200 | -2.52649000 | 1.32141000  |
| C  | -2.24381800 | -3.35845400 | 0.73664000  |
| C  | -1.60295500 | -1.76074700 | 2.45261000  |
| C  | -3.52538200 | -3.44567000 | 1.29367600  |
| H  | -2.00278800 | -3.92320800 | -0.15901100 |
| C  | -2.88990500 | -1.84220200 | 3.00295200  |
| H  | -0.85483400 | -1.09898400 | 2.87759400  |
| C  | -3.85168800 | -2.68880000 | 2.42955000  |
| H  | -4.26893700 | -4.08749900 | 0.83355500  |
| H  | -3.13950200 | -1.25090000 | 3.87821200  |
| H  | -4.84567100 | -2.75526400 | 2.86021700  |
| C  | -3.40774500 | 2.88568400  | -1.46211900 |
| C  | -1.88841800 | 3.43937500  | 0.07350700  |
| C  | -4.01776300 | 3.72874600  | -0.56880200 |
| H  | -3.79640500 | 2.37749000  | -2.32627200 |

|   |             |            |             |
|---|-------------|------------|-------------|
| N | -3.04994300 | 4.05937400 | 0.37967800  |
| H | -0.95075800 | 3.47015500 | 0.62074600  |
| H | -5.02532900 | 4.10021400 | -0.53131100 |
| H | -3.18015300 | 4.66452700 | 1.17597100  |
| N | -2.08730300 | 2.73155100 | -1.04880100 |

#### TS4

|    |             |             |             |
|----|-------------|-------------|-------------|
| Zn | -1.77428600 | 0.05204600  | 0.17578300  |
| I  | -3.68094900 | -1.76402400 | 0.28959800  |
| I  | -1.80345900 | 2.47438000  | -1.11297100 |
| O  | -0.56789500 | -0.88845800 | -1.39952700 |
| O  | -0.13909800 | 0.08788700  | 1.30297600  |
| C  | -1.01797400 | -1.97880100 | -2.31698300 |
| H  | -0.65623300 | -1.85796400 | -3.33201600 |
| H  | -2.05975100 | -2.25396100 | -2.18942700 |
| C  | -0.04742400 | -2.29368400 | -1.23247400 |
| H  | -0.44728100 | -2.77064000 | -0.34153100 |
| C  | 1.29315000  | 2.02127900  | 1.27220900  |
| H  | 1.66165300  | 2.06556100  | 2.29757400  |
| H  | 0.32404800  | 2.52211000  | 1.20833900  |
| C  | 1.10801200  | 0.54284100  | 0.80234500  |
| H  | 1.06559800  | 0.55868900  | -0.30014000 |
| C  | 2.28993800  | -0.31290000 | 1.22720100  |
| C  | 3.45579600  | -0.33773500 | 0.44288800  |
| C  | 2.25046400  | -1.04945300 | 2.42162200  |
| C  | 4.58032700  | -1.06455100 | 0.85669800  |
| H  | 3.47612900  | 0.17861900  | -0.51440200 |
| C  | 3.37063400  | -1.78675500 | 2.83139600  |
| H  | 1.34356700  | -1.04090700 | 3.01378700  |
| C  | 4.54194300  | -1.78978000 | 2.05651000  |
| H  | 5.46773300  | -1.08767500 | 0.23237100  |
| H  | 3.33065100  | -2.35457800 | 3.75533100  |
| H  | 5.40731100  | -2.36075600 | 2.37735600  |
| C  | 1.40451600  | -2.49104300 | -1.49316500 |
| C  | 2.11525200  | -3.42915400 | -0.72774200 |
| C  | 2.06815900  | -1.78531400 | -2.51291500 |
| C  | 3.46621700  | -3.68443900 | -0.99722600 |
| H  | 1.61624600  | -3.95432700 | 0.08101600  |
| C  | 3.41910100  | -2.03830000 | -2.78036200 |
| H  | 1.53071800  | -1.03518200 | -3.08624800 |
| C  | 4.11942000  | -2.99631300 | -2.02937300 |
| H  | 4.00688700  | -4.40791000 | -0.39704600 |
| H  | 3.92315700  | -1.49916800 | -3.57629000 |
| H  | 5.16424000  | -3.19809500 | -2.24152800 |
| C  | 3.59020200  | 2.94851900  | 0.60904400  |
| C  | 1.88586600  | 3.26676500  | -0.79565900 |
| C  | 4.07958200  | 3.61629900  | -0.48409800 |
| H  | 4.08445700  | 2.58967100  | 1.49418100  |
| N  | 2.99788100  | 3.80175000  | -1.34546900 |
| H  | 0.88138200  | 3.23886100  | -1.21004000 |
| H  | 5.07301200  | 3.95885800  | -0.70888200 |
| H  | 3.02339000  | 4.26809500  | -2.23964000 |
| N  | 2.22872300  | 2.75165600  | 0.39539600  |
| C  | -0.95581000 | 0.73531500  | 2.96956100  |
| O  | -0.06334500 | 0.93560900  | 3.75637700  |

|   |             |            |            |
|---|-------------|------------|------------|
| O | -2.10530900 | 0.71493700 | 2.58719400 |
|---|-------------|------------|------------|

### Intermediate 3

|    |             |             |             |
|----|-------------|-------------|-------------|
| Zn | -1.82790500 | 0.15971200  | 0.47579800  |
| I  | -4.03828000 | -1.28301200 | 0.27084800  |
| I  | -1.60662800 | 2.59988400  | -0.81589900 |
| O  | -0.72825100 | -0.87877800 | -1.08943600 |
| O  | 0.29486100  | 0.07343100  | 1.19058300  |
| C  | -1.23753500 | -1.59361100 | -2.29591800 |
| H  | -0.62790800 | -1.41307100 | -3.17394600 |
| H  | -2.31300500 | -1.52793900 | -2.42346000 |
| C  | -0.70524100 | -2.39615400 | -1.16572300 |
| H  | -1.45144200 | -2.81897800 | -0.49613800 |
| C  | 1.71415500  | 2.06259600  | 1.08301100  |
| H  | 2.21906700  | 2.07096800  | 2.04814800  |
| H  | 0.75644800  | 2.57988300  | 1.17675200  |
| C  | 1.47867700  | 0.61709900  | 0.56826600  |
| H  | 1.19395900  | 0.67402200  | -0.48847400 |
| C  | 2.72044100  | -0.23747600 | 0.70928100  |
| C  | 3.42997800  | -0.60841400 | -0.44343600 |
| C  | 3.21166800  | -0.60369700 | 1.97642800  |
| C  | 4.63701700  | -1.31460200 | -0.33909500 |
| H  | 3.02835300  | -0.36634900 | -1.42401100 |
| C  | 4.41239100  | -1.31875000 | 2.07909000  |
| H  | 2.64706000  | -0.33028400 | 2.86380500  |
| C  | 5.13366900  | -1.66637200 | 0.92400000  |
| H  | 5.17067800  | -1.60847000 | -1.23662500 |
| H  | 4.78512400  | -1.60432400 | 3.05728900  |
| H  | 6.06382400  | -2.21885000 | 1.00877600  |
| C  | 0.63929200  | -3.03126200 | -1.12396500 |
| C  | 1.19418800  | -3.32420000 | 0.13588100  |
| C  | 1.34564300  | -3.37703300 | -2.28720000 |
| C  | 2.43667300  | -3.95833100 | 0.23091600  |
| H  | 0.65559800  | -3.04307200 | 1.03563700  |
| C  | 2.59136600  | -4.01651500 | -2.19266400 |
| H  | 0.91859500  | -3.17563600 | -3.26512100 |
| C  | 3.13588000  | -4.31041500 | -0.93443600 |
| H  | 2.86120500  | -4.17029900 | 1.20577000  |
| H  | 3.12545200  | -4.29541500 | -3.09512300 |
| H  | 4.09719600  | -4.80806400 | -0.86022300 |
| C  | 3.92258100  | 2.80135500  | 0.02641500  |
| C  | 2.02960200  | 3.51749600  | -0.91700100 |
| C  | 4.26760300  | 3.55687000  | -1.06394200 |
| H  | 4.52954300  | 2.26345300  | 0.73329800  |
| N  | 3.07045500  | 3.99069500  | -1.63490300 |
| H  | 0.96949400  | 3.64573900  | -1.11235300 |
| H  | 5.23228100  | 3.80757900  | -1.46547300 |
| H  | 2.97955600  | 4.56933400  | -2.45642200 |
| N  | 2.53101800  | 2.80011500  | 0.10033200  |
| C  | -0.15250000 | 0.43387800  | 2.57544000  |
| O  | 0.70188100  | 0.72576300  | 3.42177600  |
| O  | -1.42691700 | 0.36130500  | 2.53352300  |

### TS5

|    |             |            |            |
|----|-------------|------------|------------|
| Zn | -2.38349300 | 0.17011900 | 0.24797200 |
|----|-------------|------------|------------|

|   |             |             |             |
|---|-------------|-------------|-------------|
| I | -4.91528600 | -0.36821900 | 0.42390900  |
| I | -1.07861700 | 2.24739400  | -0.89709300 |
| O | -1.61226600 | -1.41190400 | -0.85310900 |
| O | 0.68475100  | -0.41165000 | 0.89159400  |
| C | -2.05980000 | -2.81719600 | -1.07649000 |
| H | -2.09496700 | -3.08462700 | -2.12626300 |
| H | -2.90523500 | -3.10973700 | -0.46287500 |
| C | -0.73272500 | -2.54055800 | -0.44280100 |
| H | -0.66434100 | -2.64714100 | 0.63526200  |
| C | 1.99526400  | 1.53384500  | 1.55628000  |
| H | 2.67810100  | 1.64282000  | 2.38653700  |
| H | 1.35269800  | 2.36422400  | 1.29371300  |
| C | 1.98128200  | 0.24323800  | 0.70148900  |
| H | 1.99695900  | 0.50472400  | -0.35491900 |
| C | 3.10737400  | -0.70398100 | 1.04359100  |
| C | 4.09467400  | -0.98943100 | 0.09233400  |
| C | 3.17363400  | -1.29929800 | 2.31610800  |
| C | 5.14899900  | -1.85969800 | 0.40508400  |
| H | 4.03166900  | -0.54768000 | -0.89767400 |
| C | 4.22181100  | -2.17318900 | 2.62805900  |
| H | 2.40867200  | -1.08180700 | 3.05623100  |
| C | 5.21408900  | -2.45427400 | 1.67291700  |
| H | 5.90510200  | -2.08155800 | -0.34060900 |
| H | 4.26745200  | -2.63392400 | 3.60911100  |
| H | 6.02561000  | -3.13222000 | 1.91613900  |
| C | 0.55108200  | -2.65250100 | -1.19194200 |
| C | 1.51023800  | -3.58888500 | -0.77293500 |
| C | 0.80903100  | -1.83724700 | -2.30575500 |
| C | 2.70686900  | -3.73727700 | -1.48571300 |
| H | 1.32661500  | -4.19769100 | 0.10760900  |
| C | 2.01078800  | -1.98324200 | -3.01381800 |
| H | 0.07901200  | -1.08800400 | -2.59437500 |
| C | 2.95718000  | -2.93922500 | -2.61243400 |
| H | 3.44376900  | -4.46186500 | -1.15658900 |
| H | 2.20390700  | -1.35557000 | -3.87776900 |
| H | 3.88314000  | -3.05612900 | -3.16626200 |
| C | 4.77114900  | 2.40599600  | 0.36756600  |
| C | 3.00422600  | 3.23763300  | -0.64404800 |
| C | 5.24042900  | 3.24527200  | -0.62065600 |
| H | 5.32068600  | 1.80298200  | 1.06924100  |
| N | 4.11076400  | 3.76058200  | -1.25032600 |
| H | 1.98466600  | 3.44962800  | -0.92770400 |
| H | 6.24166700  | 3.50521200  | -0.91471500 |
| H | 4.10283300  | 4.41088600  | -2.02036200 |
| N | 3.38026900  | 2.41615600  | 0.33787700  |
| C | -0.05534200 | 0.13624600  | 1.92891400  |
| O | 0.62022000  | 0.91816200  | 2.69689600  |
| O | -1.28584300 | -0.15672600 | 1.95444000  |

#### Intermediate 4

|    |             |             |             |
|----|-------------|-------------|-------------|
| Zn | 1.95088100  | -0.19214800 | -0.19912100 |
| I  | 0.98253300  | -2.45082100 | 0.78808400  |
| I  | 4.33139100  | 0.79428900  | -0.27280800 |
| O  | 0.81777900  | 1.23826700  | 0.82825800  |
| O  | -1.29063300 | 0.17670900  | -1.01892100 |

|   |             |             |             |
|---|-------------|-------------|-------------|
| C | 0.86972000  | 1.56730300  | 2.28492000  |
| H | 0.98865000  | 2.62764900  | 2.47525700  |
| H | 1.48643600  | 0.89124900  | 2.86738100  |
| C | -0.40228100 | 1.06849000  | 1.68488600  |
| H | -0.64640100 | 0.02133800  | 1.84551100  |
| C | -2.51717200 | 0.05400100  | -3.01986300 |
| H | -2.80623100 | -0.96674000 | -3.27125000 |
| H | -3.01479500 | 0.77464500  | -3.66364500 |
| C | -2.67721300 | 0.35963700  | -1.50322500 |
| H | -2.93020000 | 1.40830700  | -1.32327000 |
| C | -3.61220000 | -0.56244100 | -0.76603500 |
| C | -4.96994200 | -0.21701300 | -0.67236100 |
| C | -3.14792300 | -1.75692200 | -0.19319300 |
| C | -5.86813100 | -1.07192800 | -0.02010200 |
| H | -5.32403600 | 0.72112300  | -1.09170200 |
| C | -4.04756200 | -2.60432100 | 0.46930900  |
| H | -2.09369300 | -2.01463400 | -0.23338400 |
| C | -5.40723600 | -2.26770700 | 0.55341600  |
| H | -6.91688300 | -0.80394300 | 0.04849600  |
| H | -3.68254600 | -3.52051000 | 0.91984600  |
| H | -6.09981300 | -2.92698900 | 1.06537800  |
| C | -1.54307300 | 1.96332200  | 1.34661200  |
| C | -2.83874800 | 1.59661400  | 1.74217700  |
| C | -1.34493700 | 3.15166500  | 0.62088000  |
| C | -3.93131200 | 2.41796700  | 1.42803700  |
| H | -3.00072800 | 0.66597100  | 2.27760000  |
| C | -2.43803100 | 3.96646300  | 0.29864600  |
| H | -0.34528800 | 3.41482800  | 0.28965900  |
| C | -3.73457800 | 3.60342000  | 0.70426500  |
| H | -4.92844700 | 2.12550200  | 1.73868400  |
| H | -2.28133100 | 4.88155700  | -0.26242300 |
| H | -4.57861900 | 4.24046700  | 0.46202800  |
| C | -0.41791100 | 0.14691400  | -2.05717200 |
| O | -1.05961000 | 0.17940600  | -3.24999200 |
| O | 0.80505400  | 0.09662000  | -1.92026500 |
